# Supplementary material for: Aqueous alkaline phosphate facilitates the non-exchangeable deuteration of peptides and proteins
Source: Royal Society of Chemistry journal article supplement (doi:10.1039/d3ra08636d), 2024-01-01

# Aqueous Alkaline Phosphate Facilitates the Non-exchangeable Deuteration of Peptides and Proteins

Tingting Zhang,<sup>ab</sup> Zhixiong Jin,<sup>ac</sup> Heng Zhao,<sup>a</sup> Can Lai,<sup>ab</sup> Zheyi Liu,<sup>a</sup> Pan Luo,<sup>d</sup> Zhe Dong,<sup>e</sup> and Fangjun Wang<sup>\*ab</sup>

**a** CAS Key Laboratory of Separation Sciences for Analytical Chemistry, State Key Laboratory of Molecular Reaction Dynamics, Dalian Institute of Chemical Physics, Chinese Academy of Sciences, Dalian 116023, China.

**b** University of Chinese Academy of Sciences, Beijing 100049

**c** Department of Chemistry, Zhejiang University, Hangzhou 310027, China

**d** Institute of Advanced Science Facilities, Shenzhen 518000, China

**e** Shenzhen Grubbs Institute and Department of Chemistry, Guangdong Provincial Key Laboratory of Catalysis, Southern University of Science and Technology, Shenzhen, China.

\*Dalian Institute of Chemical Physics, Chinese Academy of Sciences, Dalian 116023, China.

Email: [wangfj@dicp.ac.cn](mailto:wangfj@dicp.ac.cn)

# Table of Contents

|                                                            |           |
|------------------------------------------------------------|-----------|
| <b>Part I. Data Analysis.....</b>                          | <b>3</b>  |
| <b>Part II. Supplementary Figures .....</b>                | <b>5</b>  |
| <b>Part III. Supporting Information NMR Part .....</b>     | <b>8</b>  |
| <b>Part III. Supporting Information HPLC-MS/MS Part ..</b> | <b>16</b> |

## Part I. Data Analysis.

### Peptide:

The average mass of peptide is calculated by taking the average mass of all the isotopic peaks weighted by their intensities. This means that for an isotopic peak distribution containing n peaks the average mass (M) can be found using Equation 1

Equation 1:

$$M_{deuterium} = \frac{\sum_{i=1}^n I_i \cdot M_i}{\sum_{i=1}^n I_i}$$
$$M_{un-deuterium} = \frac{\sum_{i=1}^n I_i \cdot M_i}{\sum_{i=1}^n I_i}$$

$$\frac{\text{Deuterium}}{\text{molecular}} = (M_{deuterium} - M_{un-deuterium}) * \text{charge}$$

### Protein:

$$\text{Deuterium mass} = [(m/z)_{deuterium} - (m/z)_{undeuterium}] * z$$

where  $(m/z)_{deuterium}$  is the centroid mass of the fragment ions of interest, whereas  $(m/z)_{undeuterium}$  is the corresponding reference data for completely unlabeled samples fragment ions.

All biochemical graphs were produced using OriginPro 2019b (OriginLab) or R script.

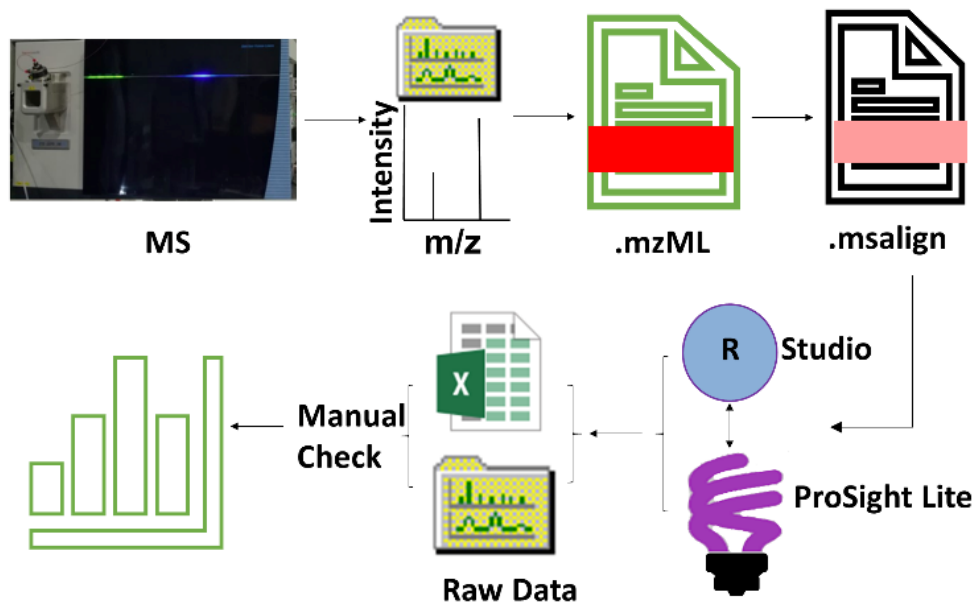

**Figure S 1** Data analysis flowchart

These Mb regions include: N-terminus (Gly 1 to Ser 3), A-helix (Asp 4 to Ala 19), B-helix (Asp 20 to Gly 35), C-helix (His 36 to Lys 42), CD loop (Phe 43 to Lys 50), D-helix (Thr 51 to Ala 57), E-helix (Ser 58 to Lys 77), EF loop (Lys 78 to Glu 85), F-helix (Leu 86 to Ala 94), FG loop (Thr 95 to Ile 99), G-helix (Pro 100 to Lys 118), GH loop (His 119 to Phe 123), H-helix (Gly 124 to Gly 150), and C terminus (Phe 151 to Gly 153).

## Part II. Supplementary Figures

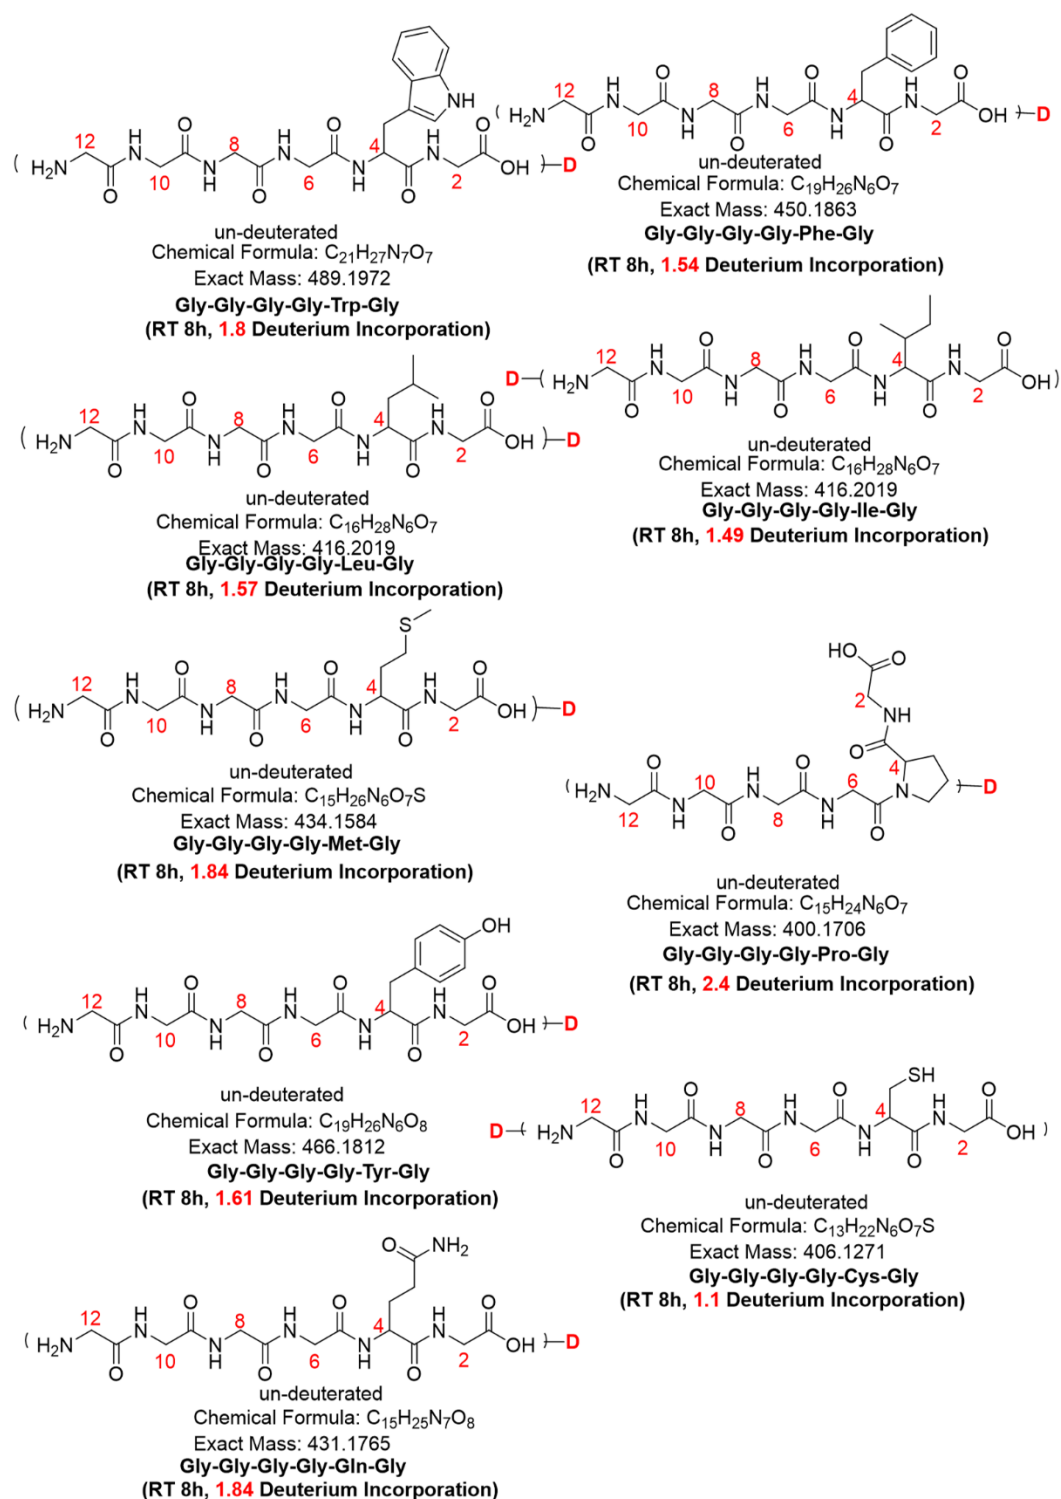

**Figure S2** Hexa-peptides deuteration (backbone deuteration)

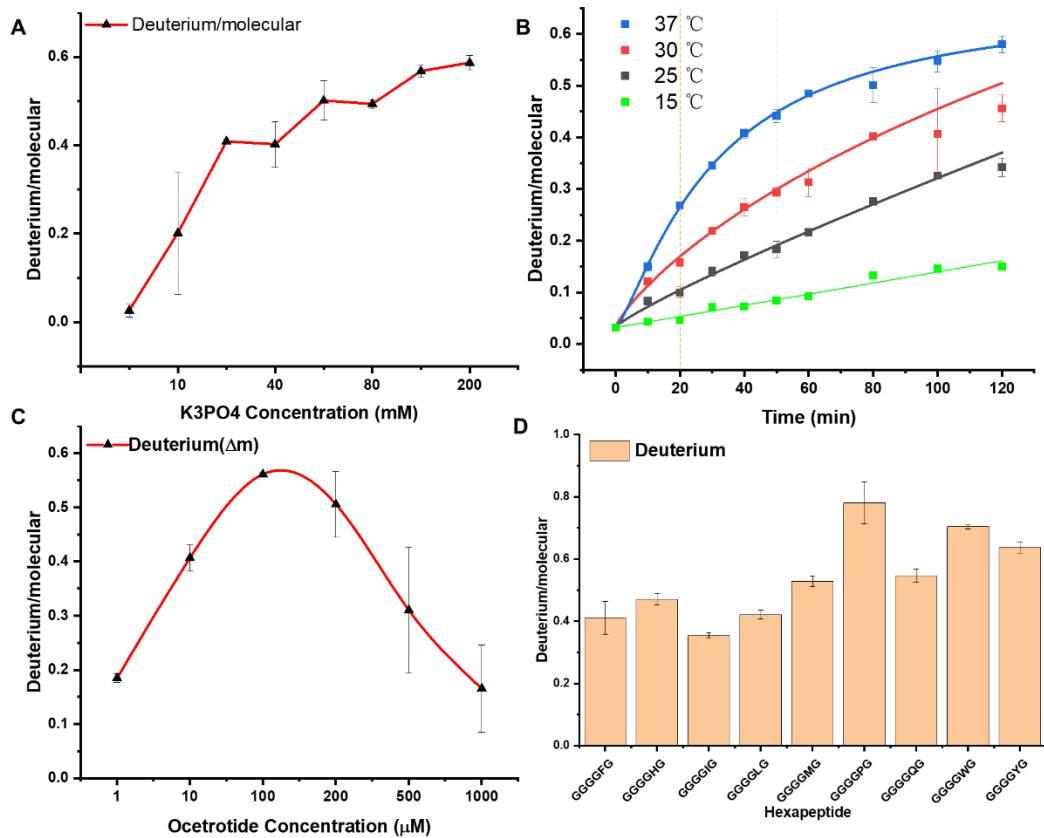

**Figure S3** The investigation of optimal conditions for the deuteration of octreotide, including: A) potassium phosphate concentration, B) reaction time at 50 mM potassium phosphate condition, C) octreotide concentration (50 mM potassium phosphate), and D) the deuteration rates of standard hexapeptides at 2 hours. (Triple parallel experiments)

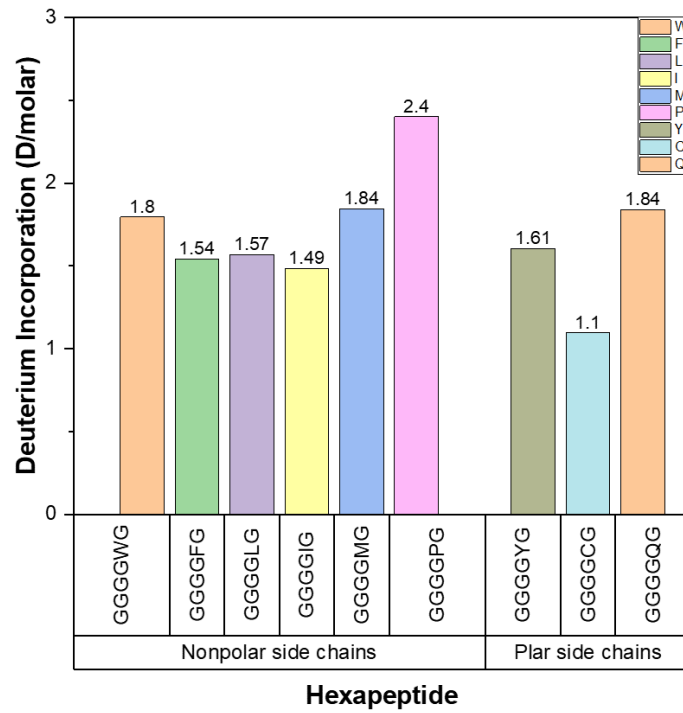

**Figure S4** The deuterium incorporation of hexapeptide at 8 h (100 mM potassium phosphate).

### Part III. Supporting Information NMR Part

**Figure S5**  $^1\text{H}$ NMR stacked spectra demonstrating the selective backbone deuteration of standard hexapeptides.



1303-GGGWG-control-1  
single\_pulse 2

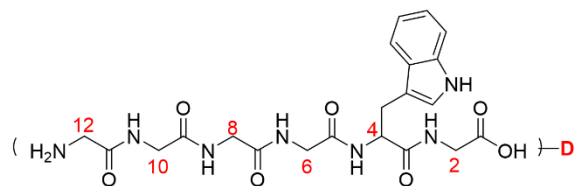

GGGGWG\_Standard

**Gly-Gly-Gly-Gly-Trp-Gly**  
**(RT 8h, 1.8 Deuterium Incorporation)**

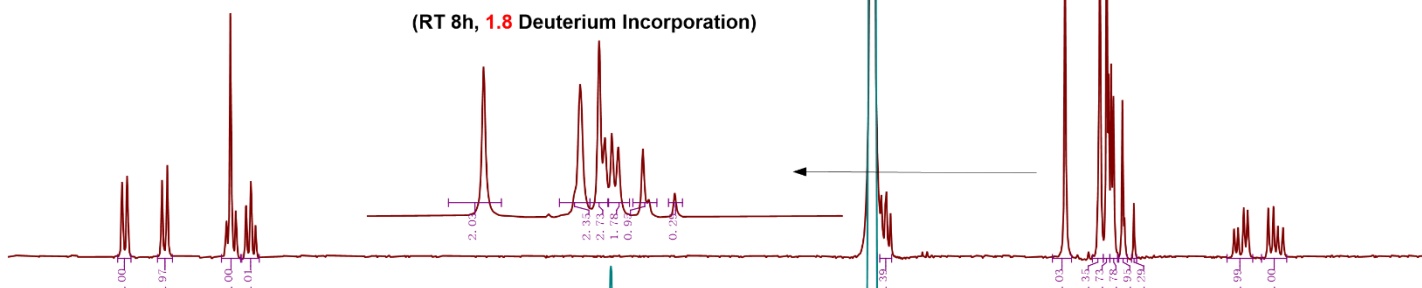

1303-GGGWG-SAMPLE=2  
single\_pulse 1

GGGGWG\_Deuterium Incorporation

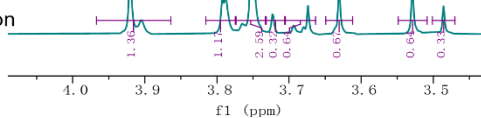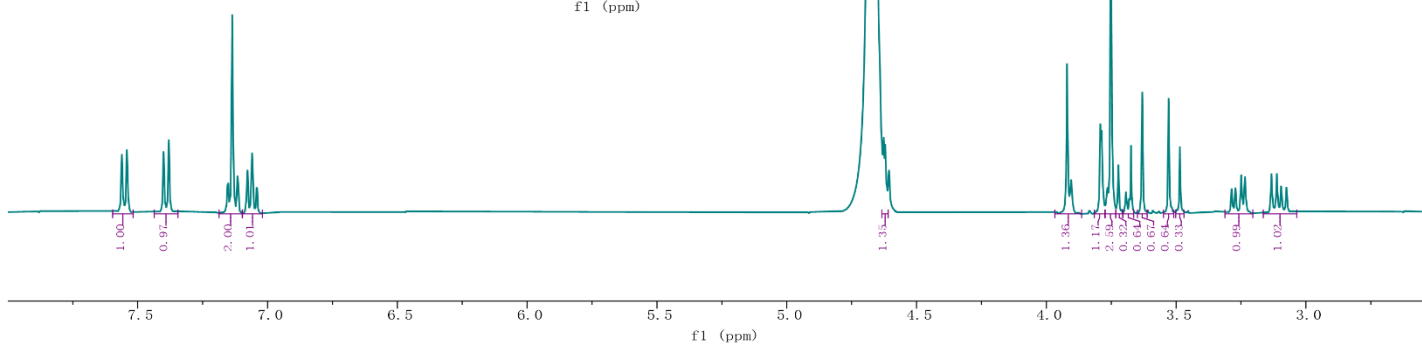

1303-GGGFG-control-3  
single\_pulse 2

GGGFG\_Standard

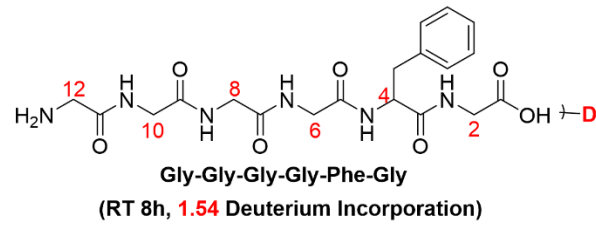

1303-GGGFG-SAMPLE-4  
single\_pulse 1

GGGFG\_Deuterium Incorporation

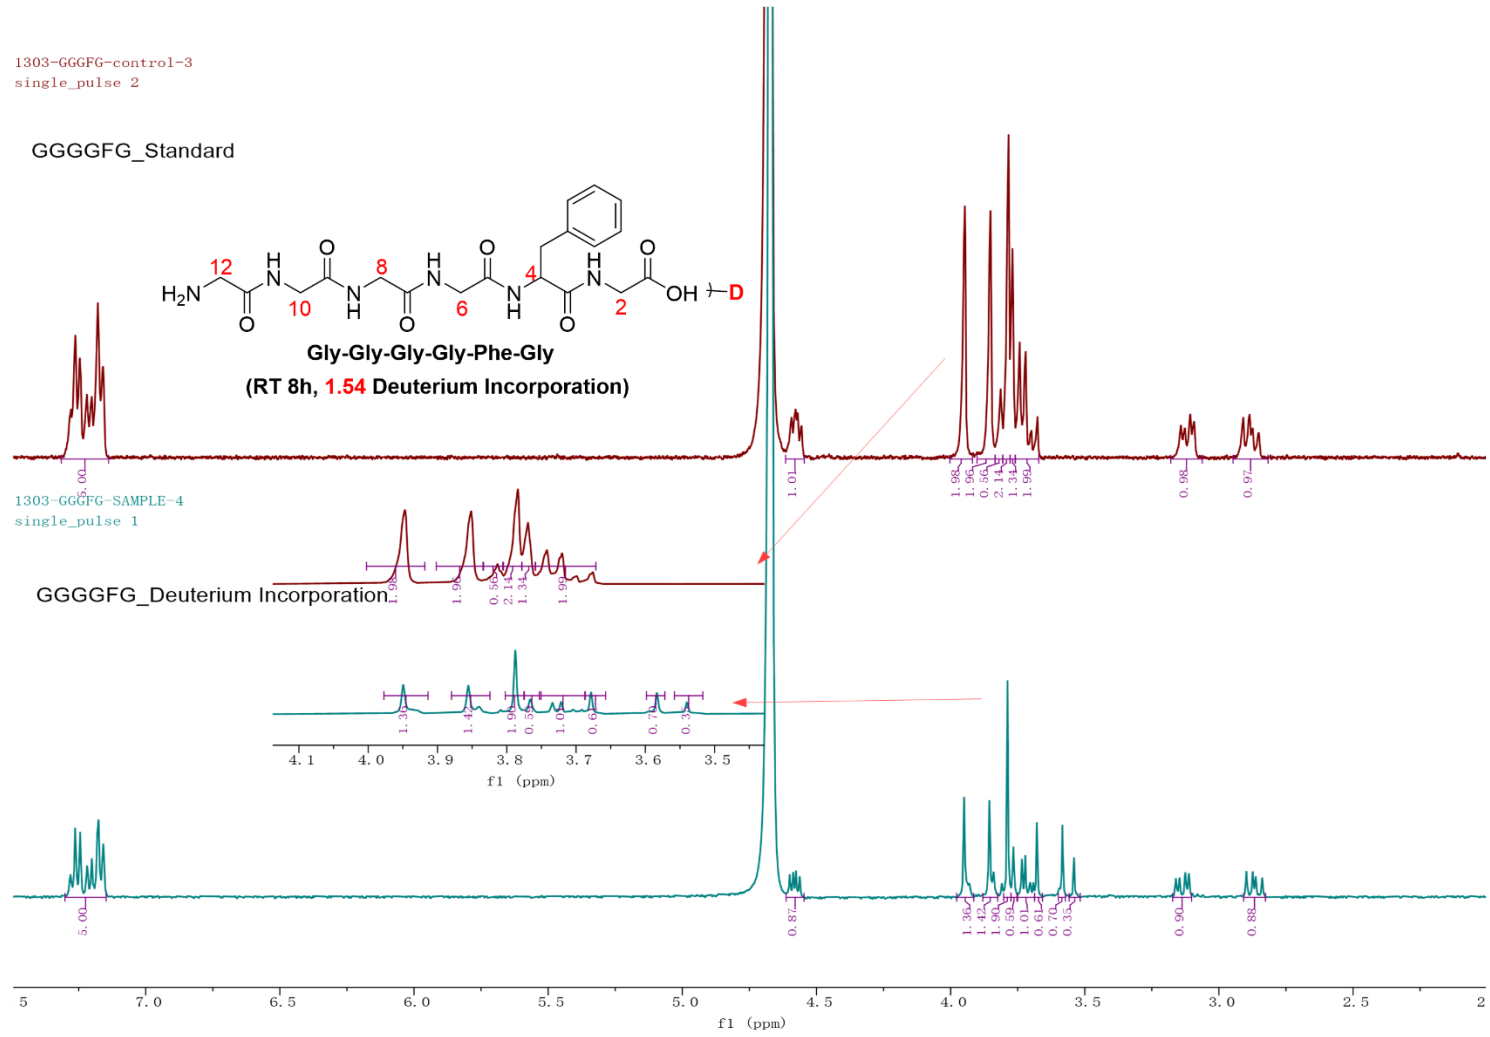

.754-5.10.fid  
2

GGGGYG\_Standard

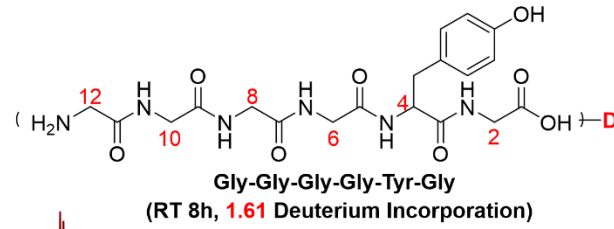

.737-6.11.fid  
1

GGGGYG\_Deuterium Incorporation

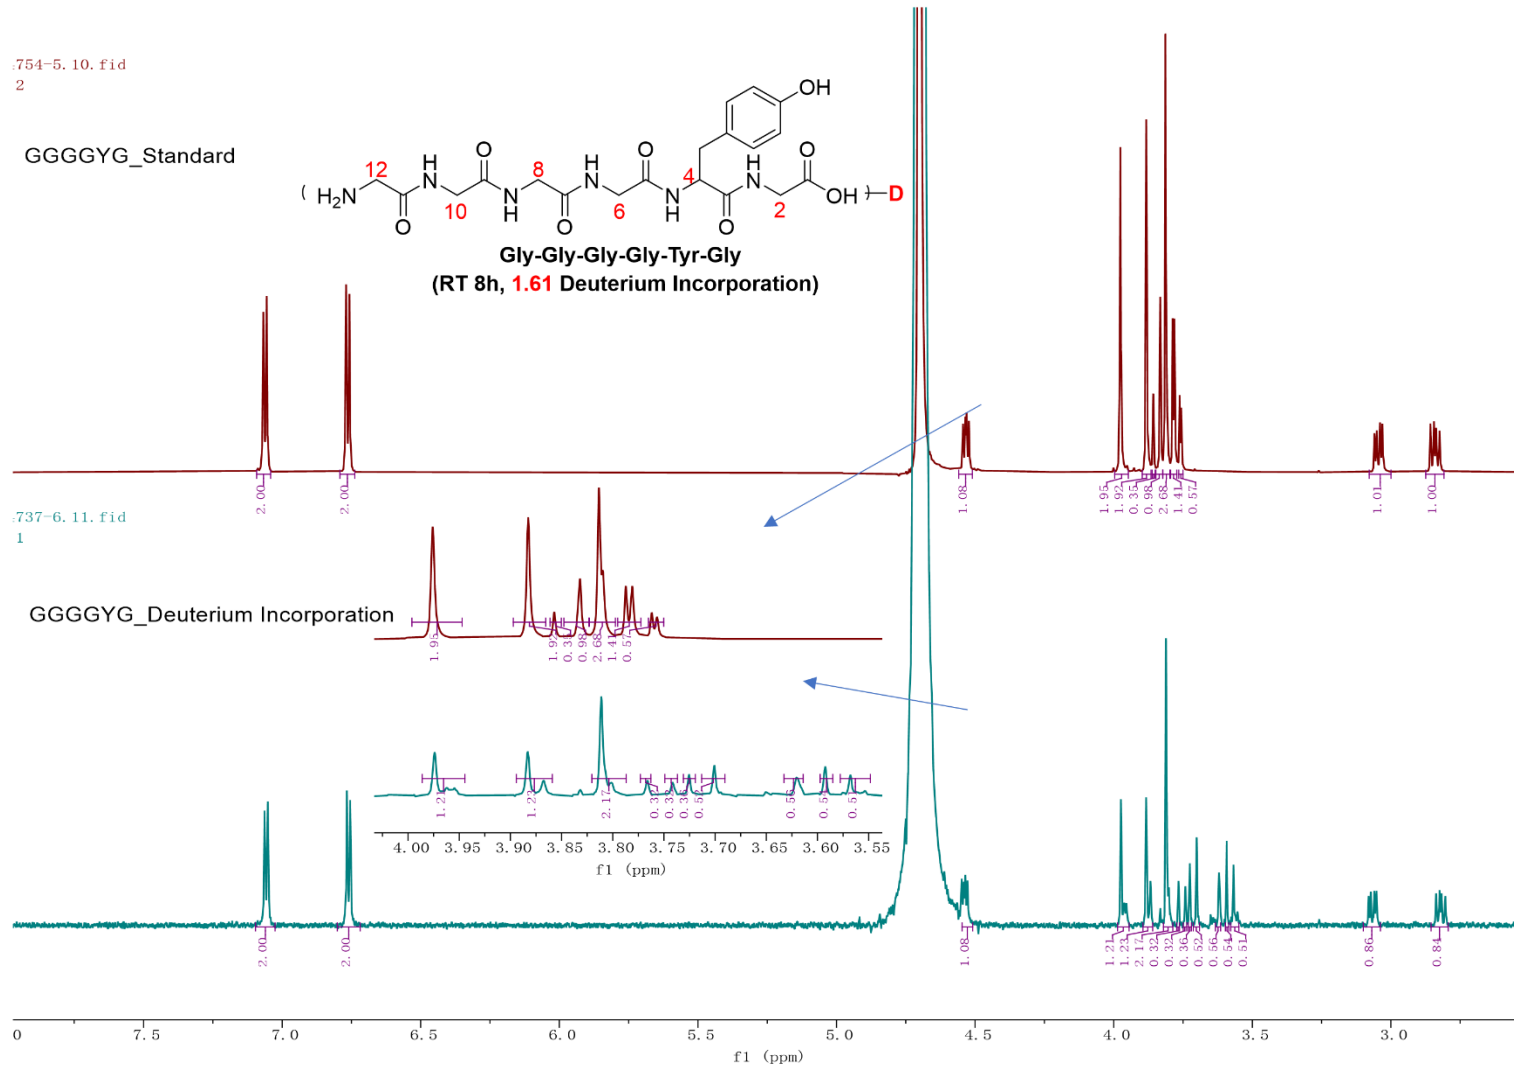

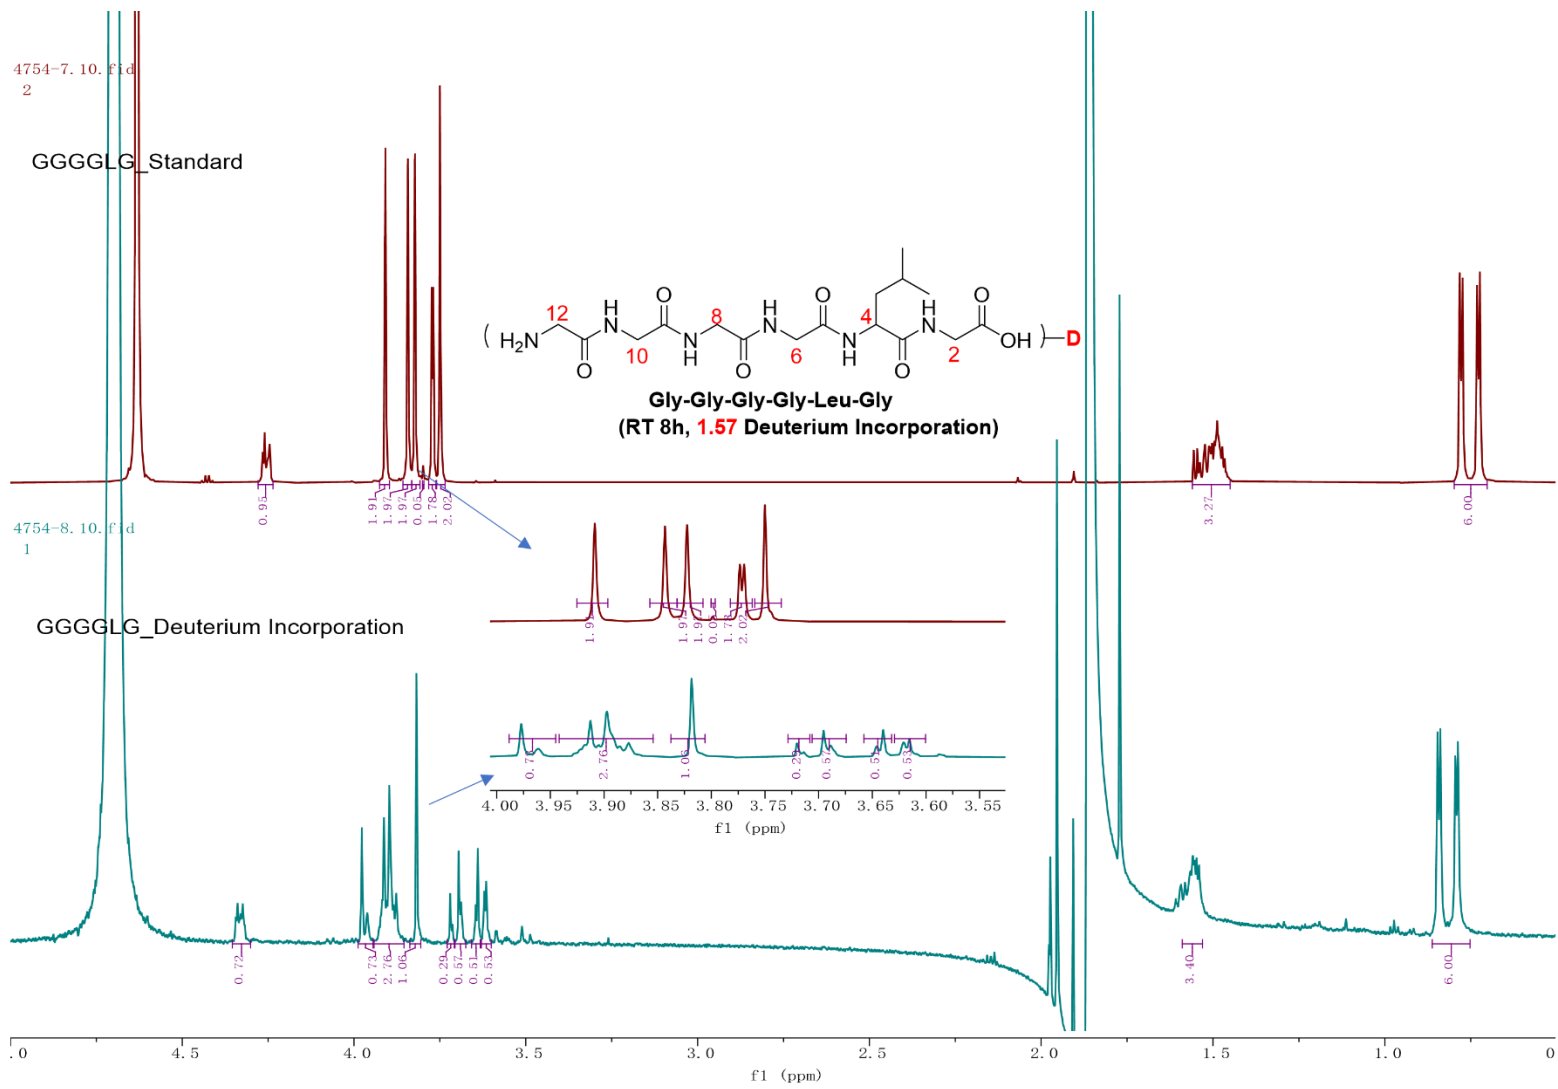

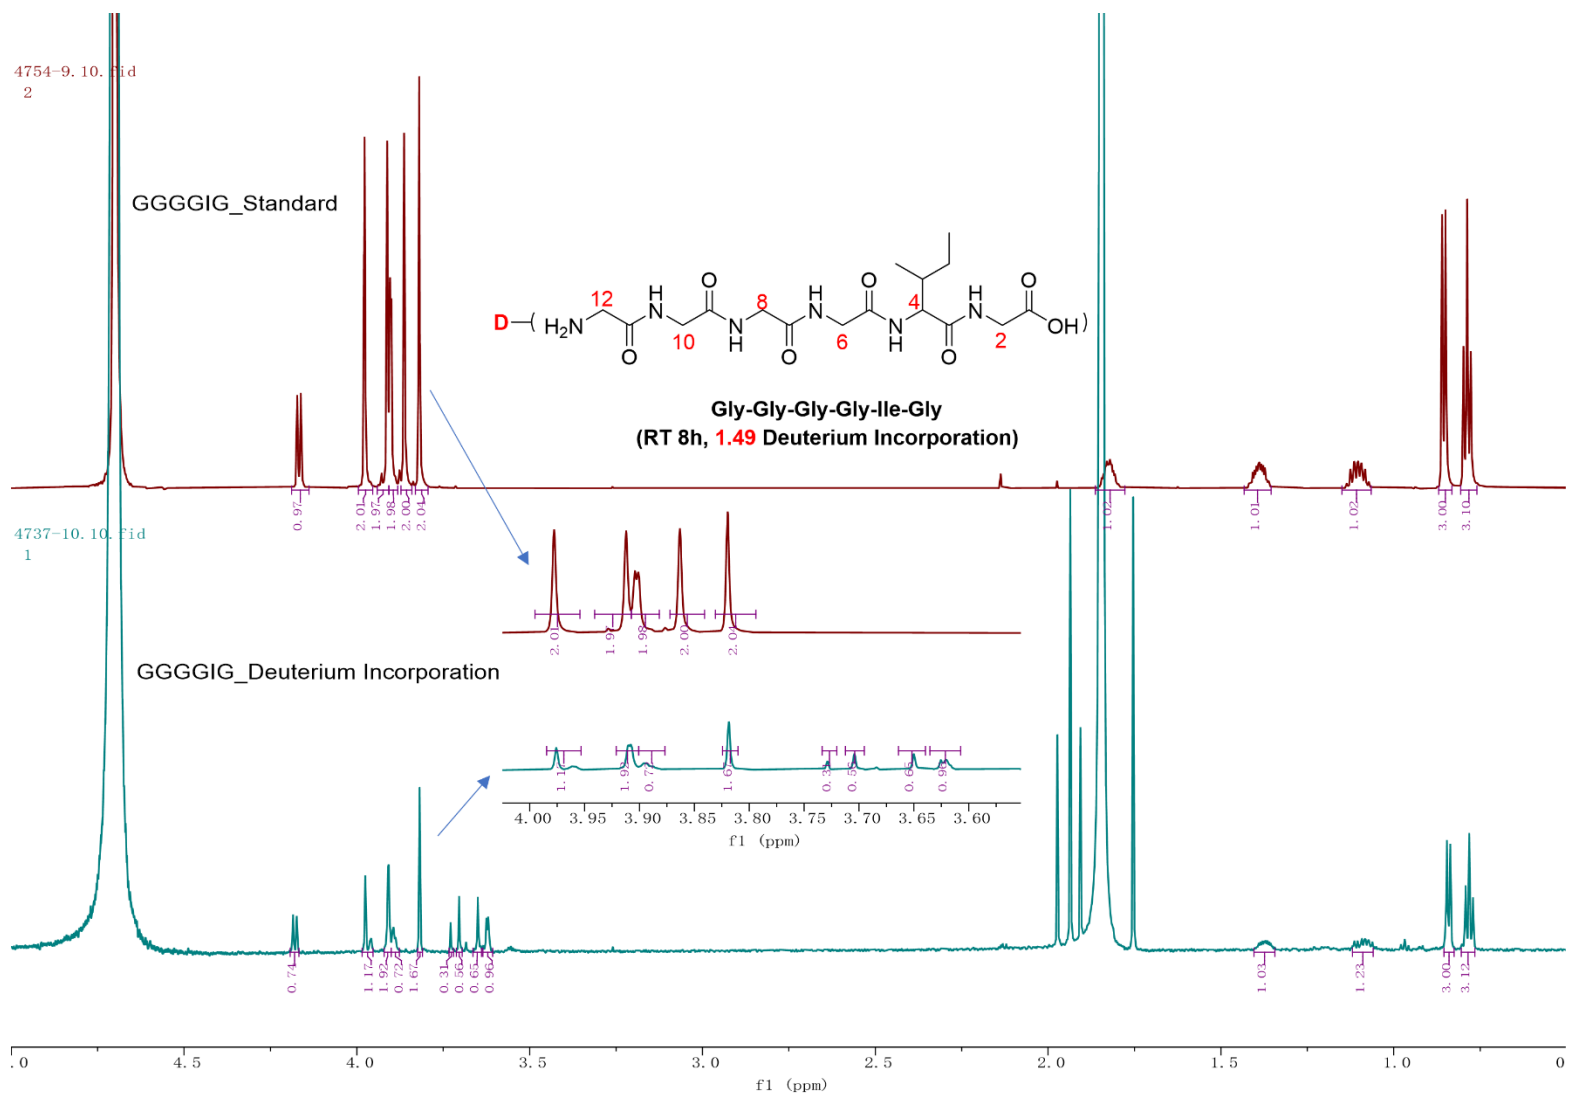

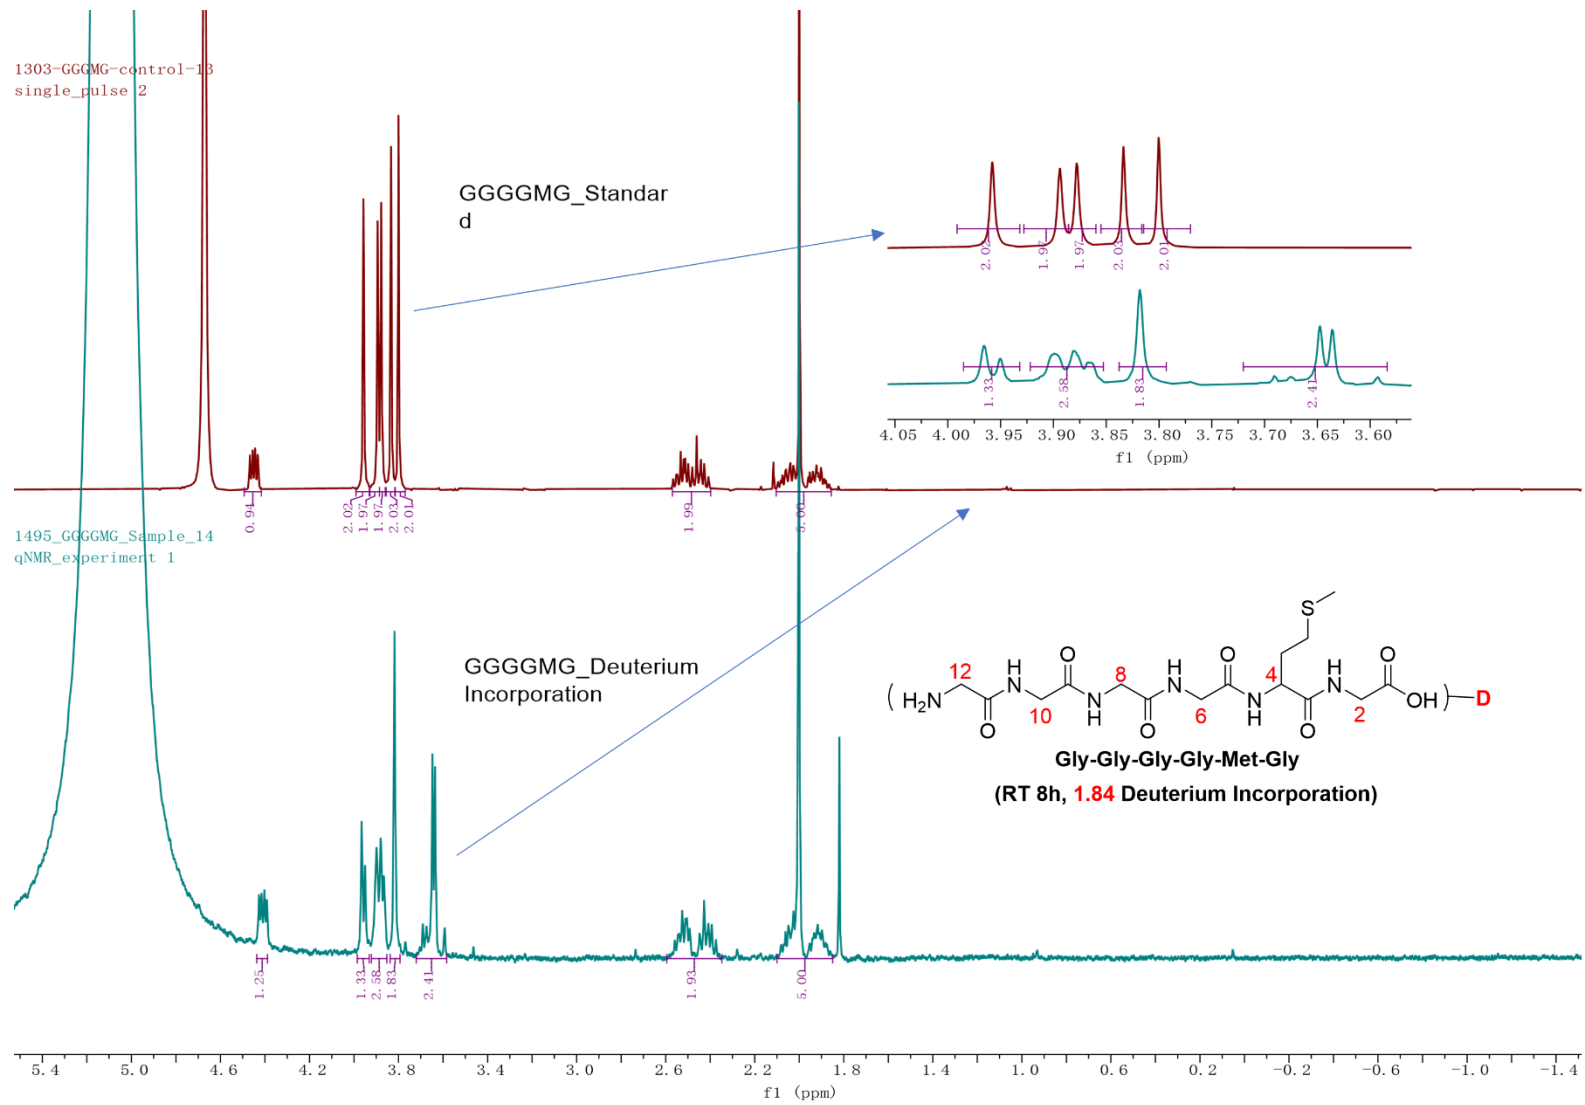

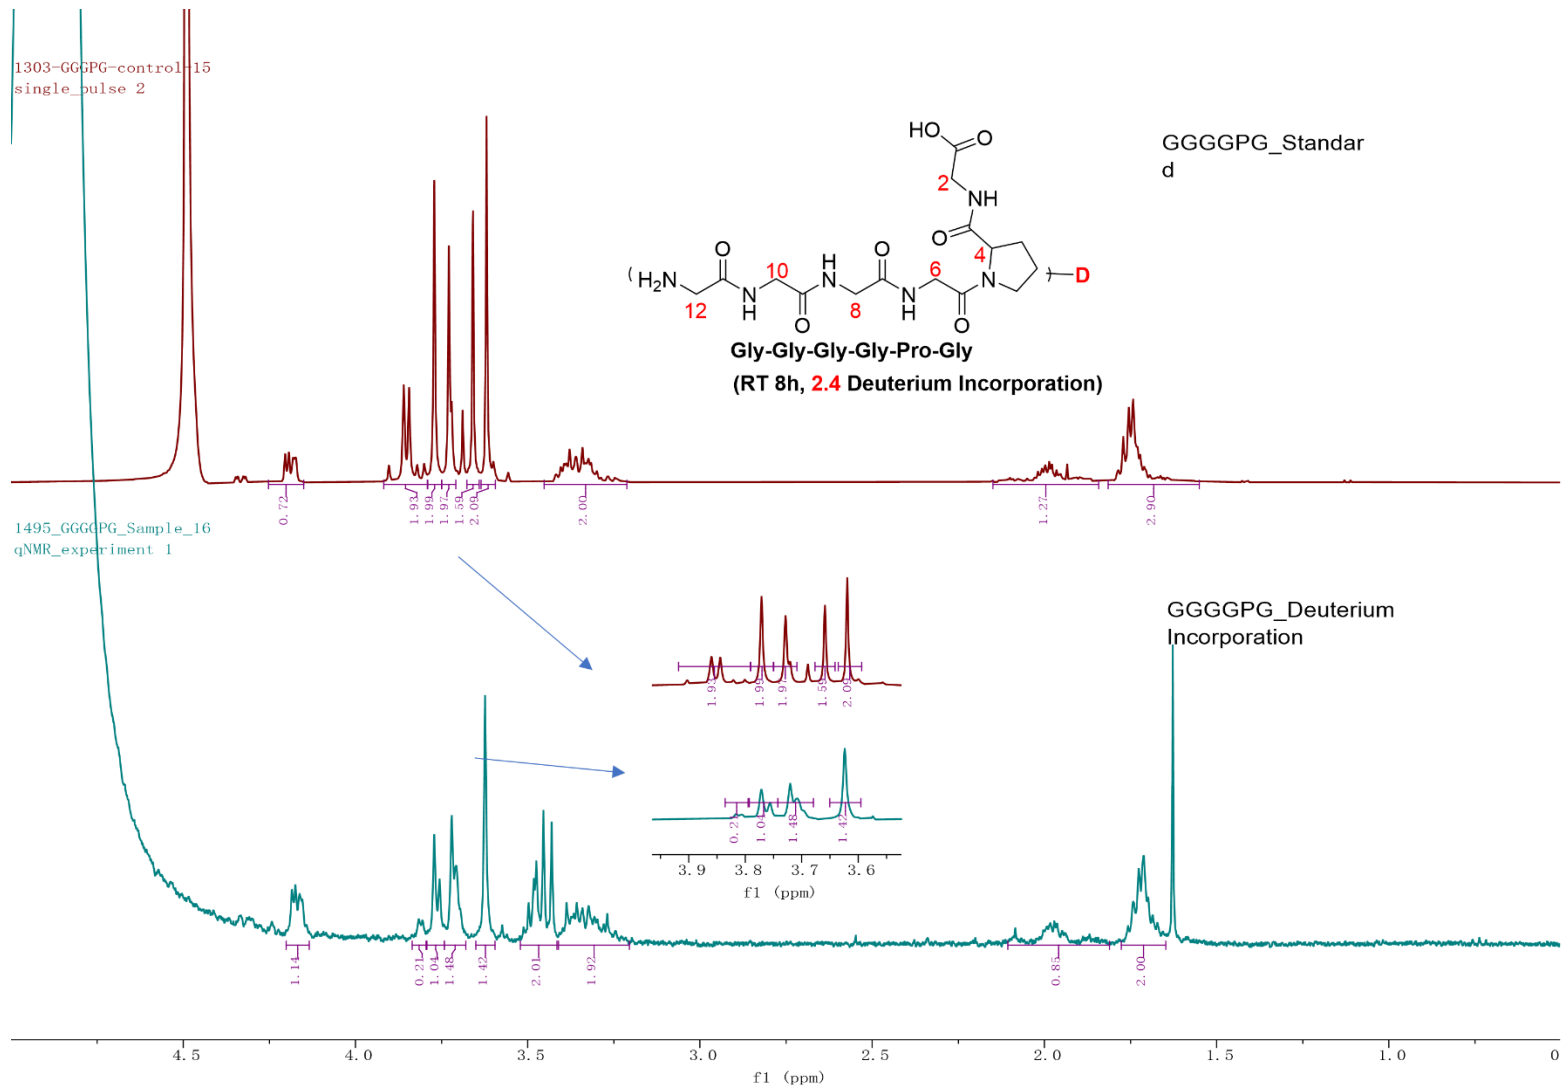

### **Part III. Supporting Information HPLC-MS/MS Part**

**Figure S6** The HPLC-MS spectra of the standard hexapeptides.



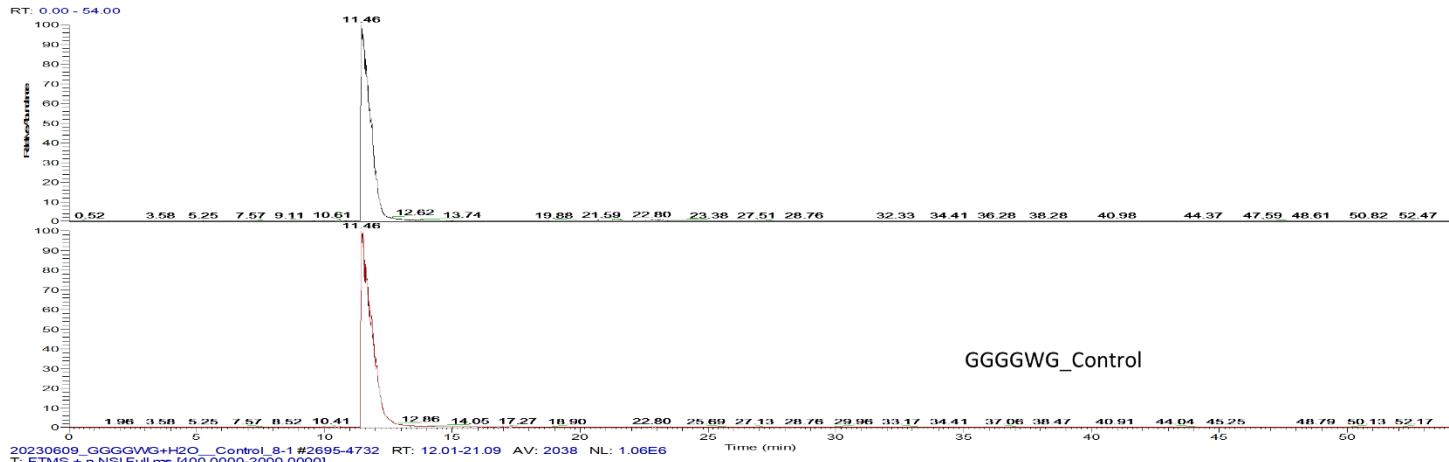

NL: 3.27E8  
 TIC: MS  
 20230609\_GG  
 GGGW+  
 H2O\_Control  
 \_8-1

NL: 9.77E7  
 Base Peak F:  
 Full ms MS  
 20230609\_GG  
 GGGW+  
 H2O\_Control  
 \_8-1

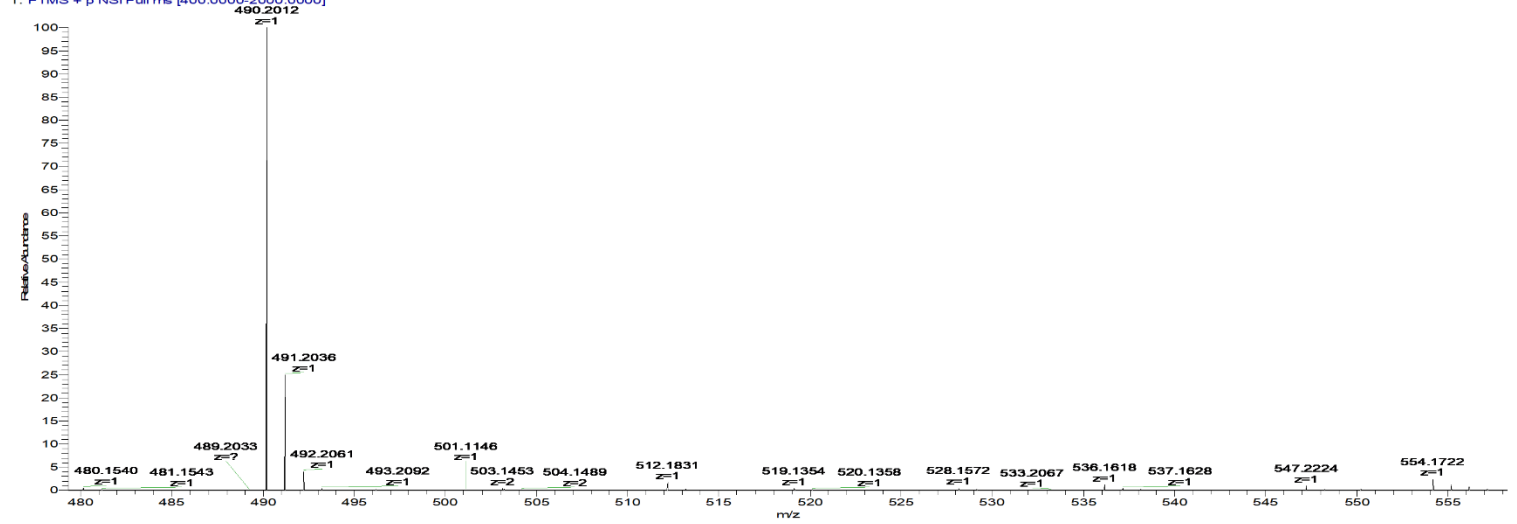

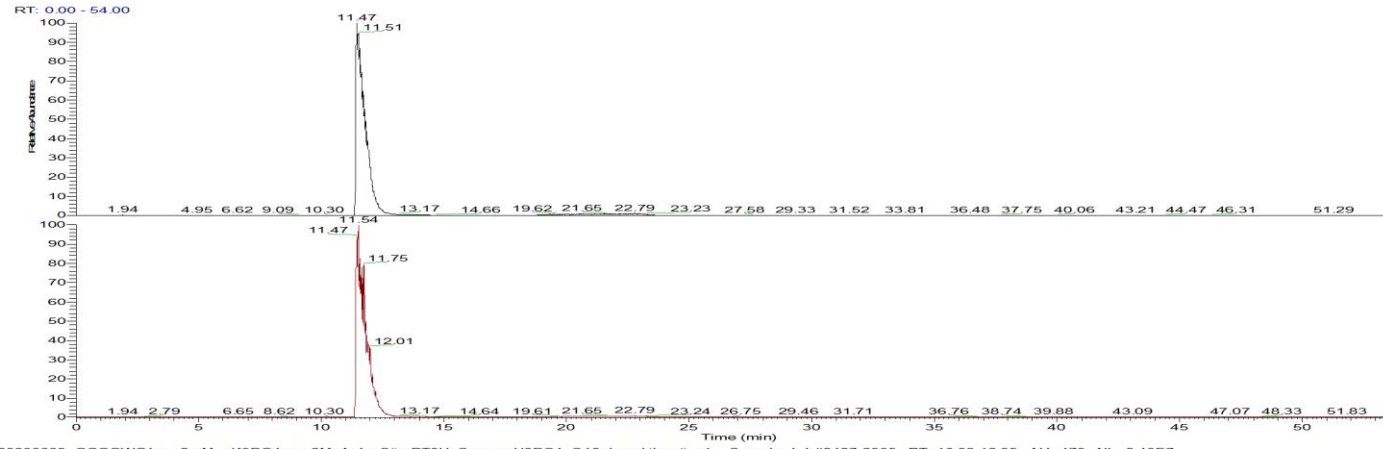

NL: 7.14E8  
 TIC MS  
 20230609\_GGGGWG1mg-  
 2mM\_4K3PO4-mg-2M+  
 Ar4unStir  
 RT8H\_ScavgerH3PO4\_C18\_Ly  
 ophilization1\_Sample\_1-1

NL: 1.26E8  
 Base Peak F: Full ms MS  
 20230609\_GGGGWG1mg-  
 2mM\_4K3PO4-mg-2M+  
 Ar4unStir  
 RT8H\_ScavgerH3PO4\_C18\_Ly  
 ophilization1\_Sample\_1-1

20230609\_GGGGWG1mg-2mM\_4K3PO4-mg-2M+Ar4unStir+RT8H\_ScavgerH3PO4\_C18\_Lyophilization1\_Sample\_1-1 #2427-2905 RT: 10.82-12.95 AV: 479 NL: 2.40E7  
 T: FTMS + p NSI Full ms [400.0000-2000.0000]

GGGGWG\_Sample

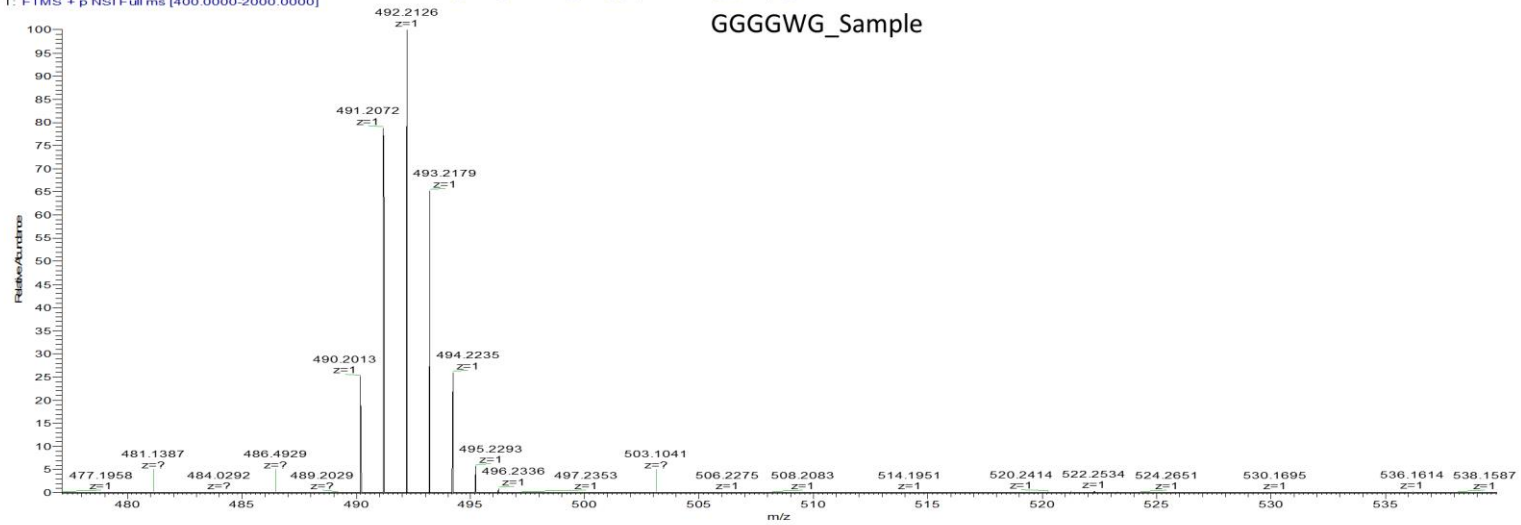

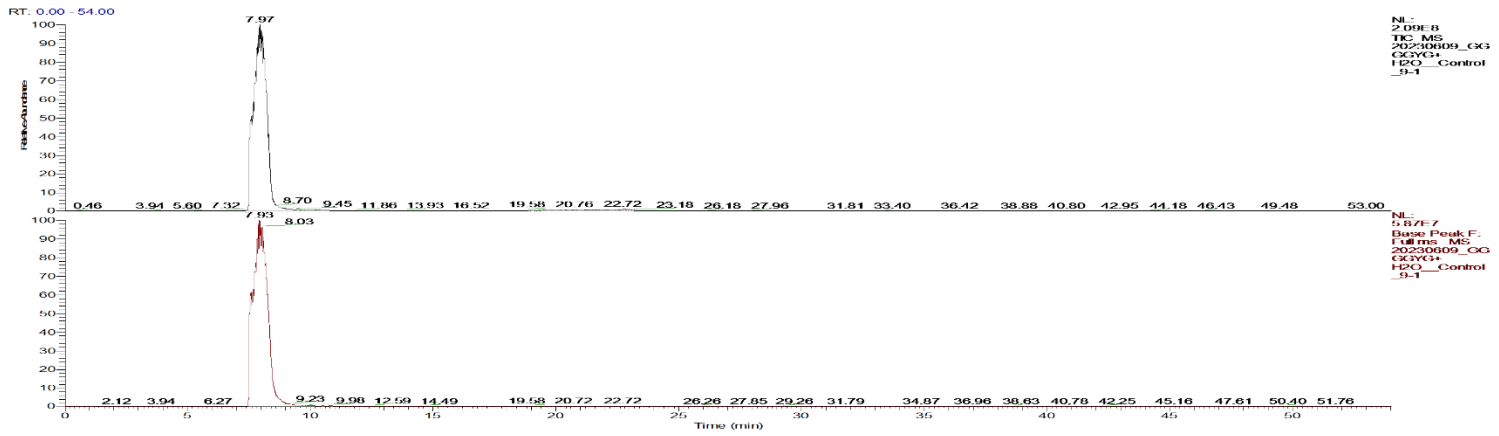

20230609\_GGGYG+H2O\_Control\_9-1 #1632-2048 RT: 7.27-9.13 AV: 417 NL: 2.00E7  
 T: FTMS + p NSI Full ms [400.0000-2000.0000]

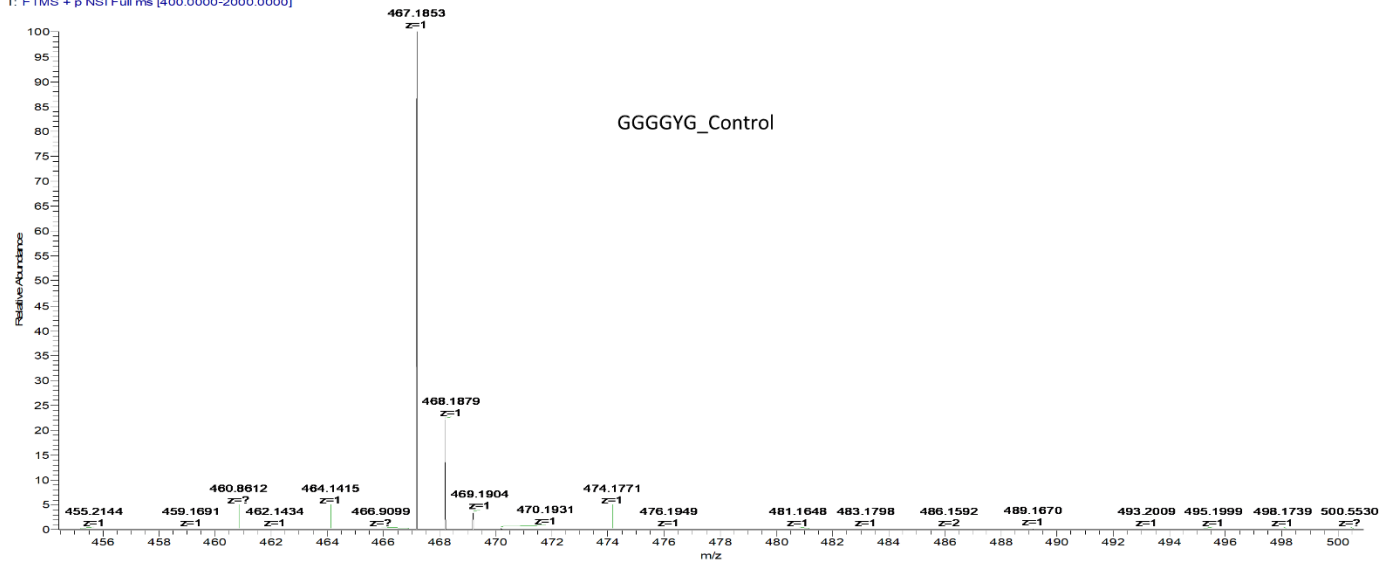

RT: 0.00 - 64.00

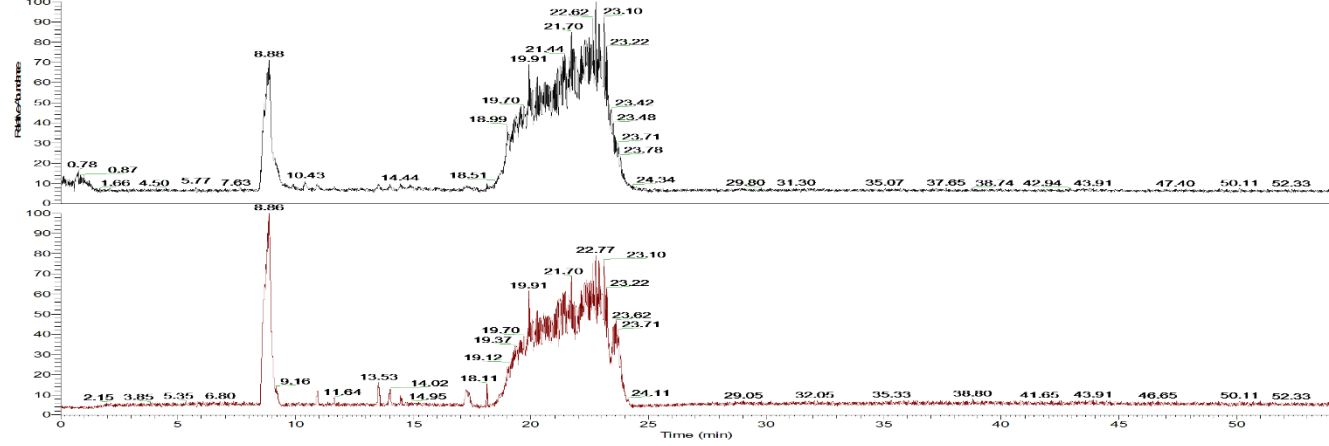

NL: 3.60E0  
TIC MS  
20230611\_GGGGYG1mg-  
2mM+K3PO4-mg-2M+  
Ar4unStir+  
RT8H\_ScavgerH3PO4\_C18\_Ly  
ophylization1\_Sample\_1-1

NL: 4.76E5  
Base Peak 1: Full ms MS  
20230611\_GGGGYG1mg-  
2mM+K3PO4-mg-2M+  
Ar4unStir+  
RT8H\_ScavgerH3PO4\_C18\_Ly  
ophylization1\_Sample\_1-1

20230611\_GGGGYG1mg-2mM+K3PO4-mg-2M+Ar4unStir+RT8H\_ScavgerH3PO4\_C18\_Lyophylization1\_Sample\_1-1 #1977 RT: 8.81 AV: 1 NL: 4.13E5  
T: FTMS + p NSI Full ms [400.0000-2000.0000]

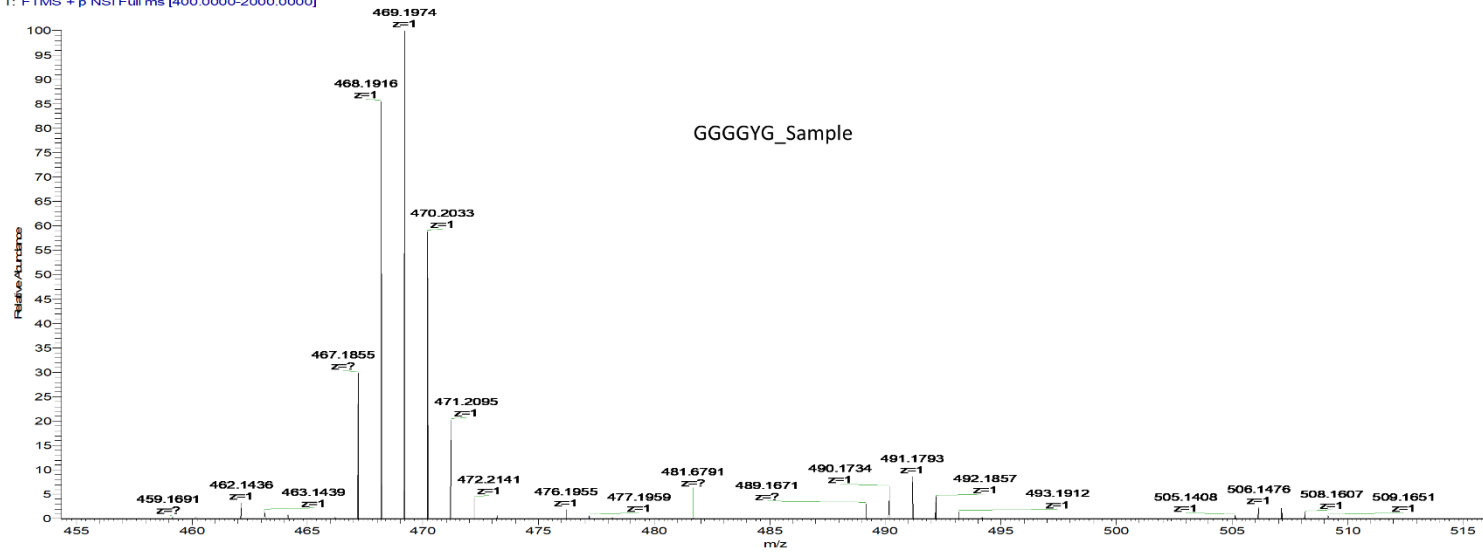

GGGGYG\_Sample

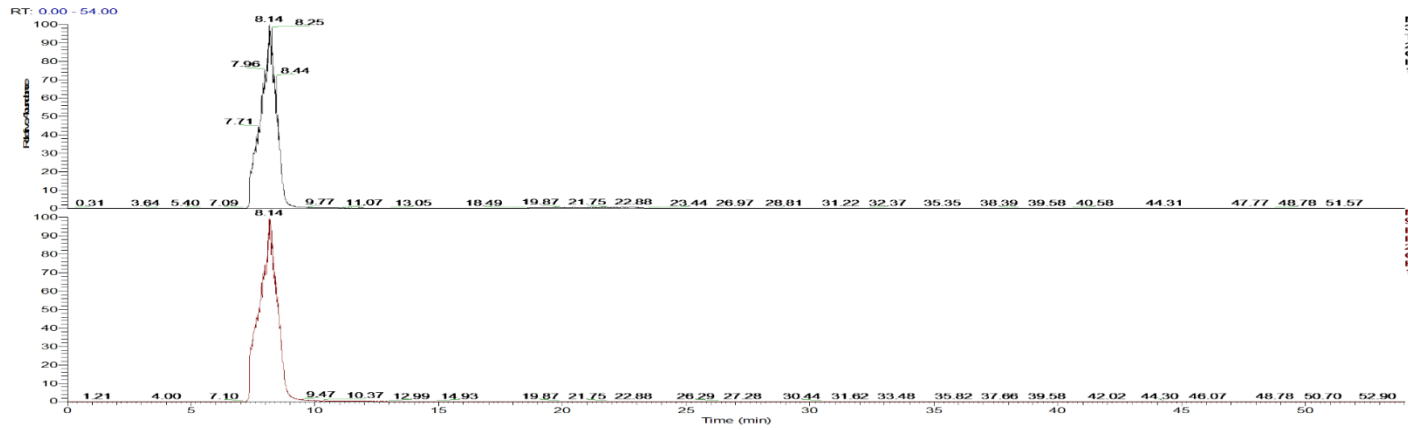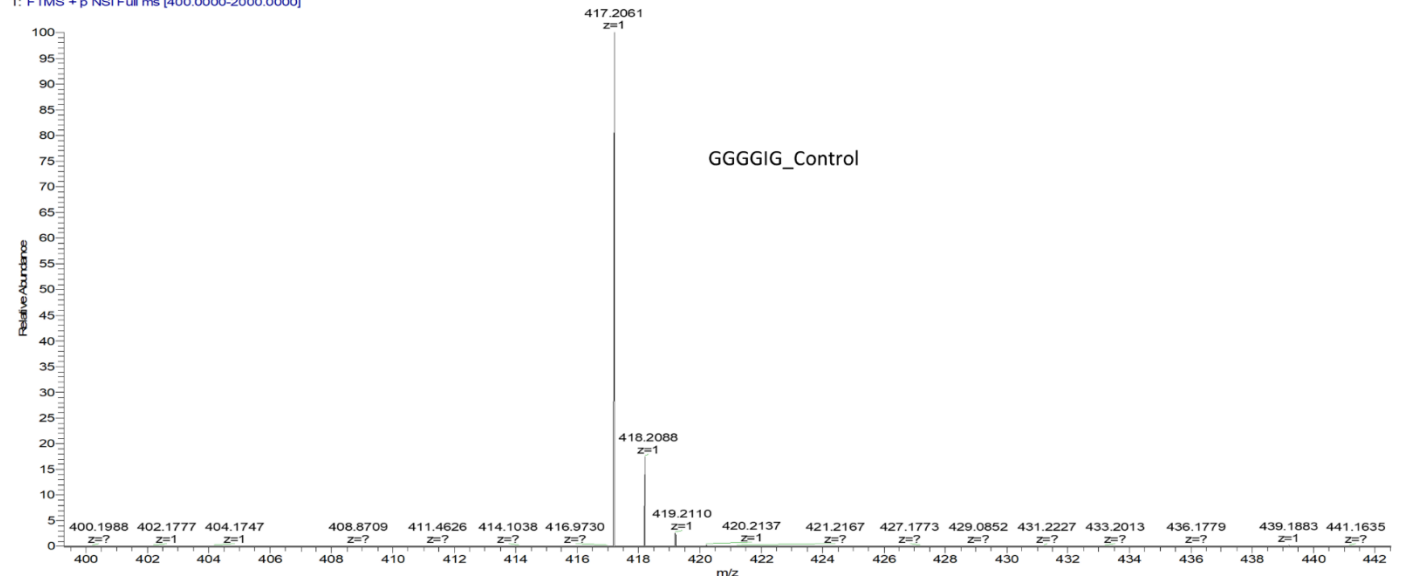

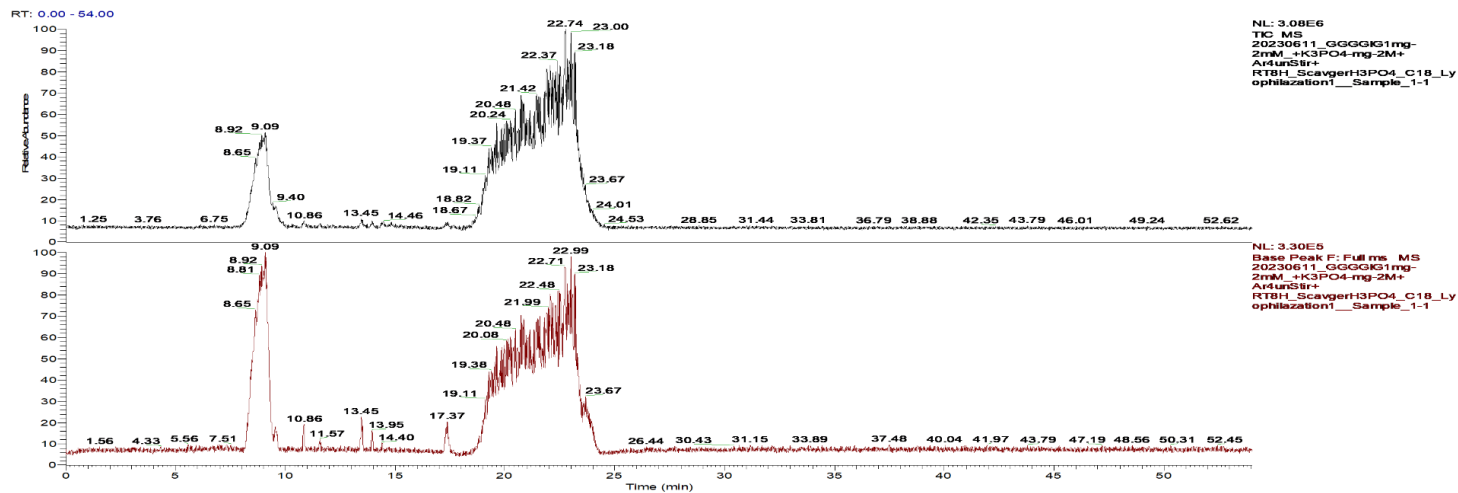

20230611\_GGGGIG1mg-2mM\_+K3PO4-mg-2M+ArdunStr+RTBH\_ScavgerH3PO4\_C18\_Lyophlization1\_\_Sample\_1-1 #1821-2142 RT: 8.11-9.55 AV: 322 NL: 1.52E5  
T: FTMS +p NSI Full ms [400.0000-2000.0000]

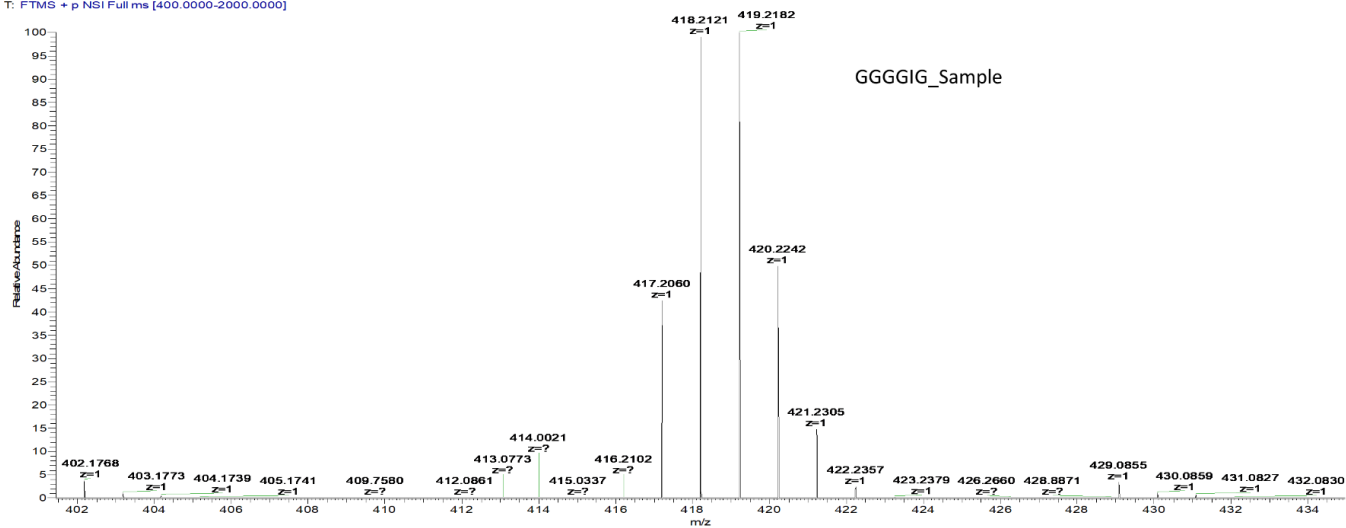

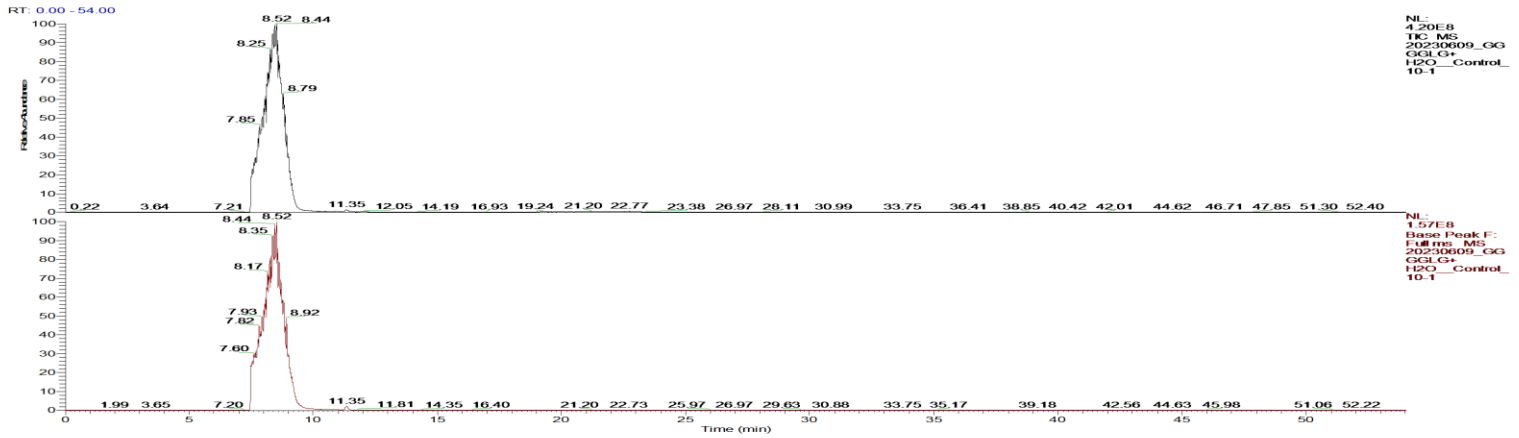

20230609\_GGGGLG+H2O\_Control\_10-1 #1609-2111 RT: 7.17-9.41 AV: 503 NL: 5.76E7  
 T: FTMS + p NSI Full ms [400.0000-2000.0000]

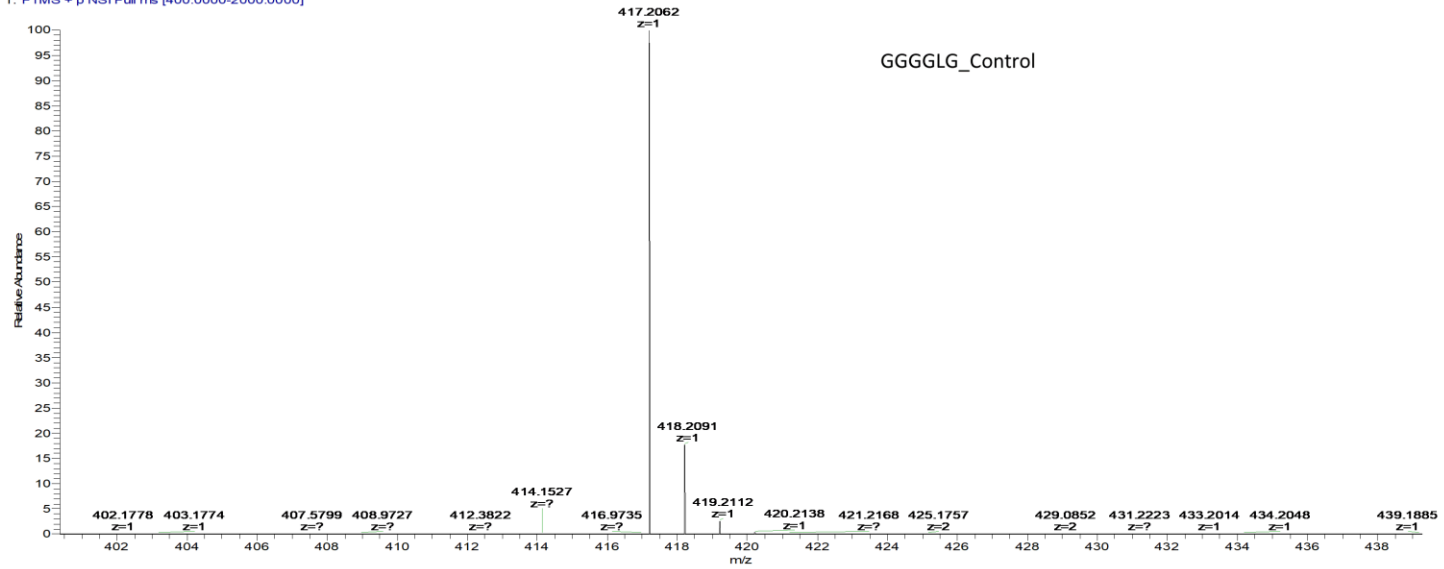

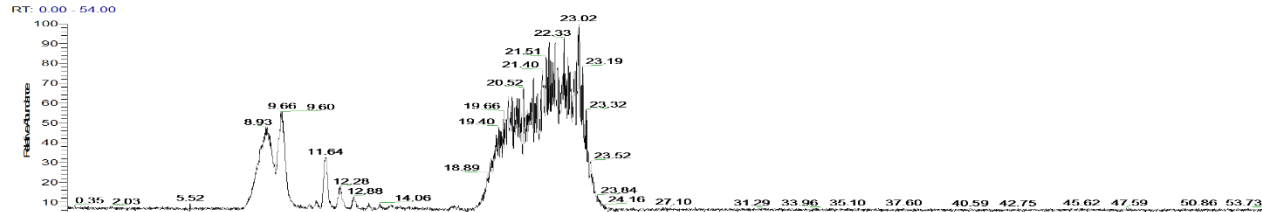

NL: 3.26E6  
 TIC MS  
 20230611\_GGGGLG1mg-  
 2mM +K3PO4-mg-2M+  
 Ar4unStr+  
 RT8H\_ScavgerH3PO4\_C18\_Ly  
 optimization1\_Sample\_1-1

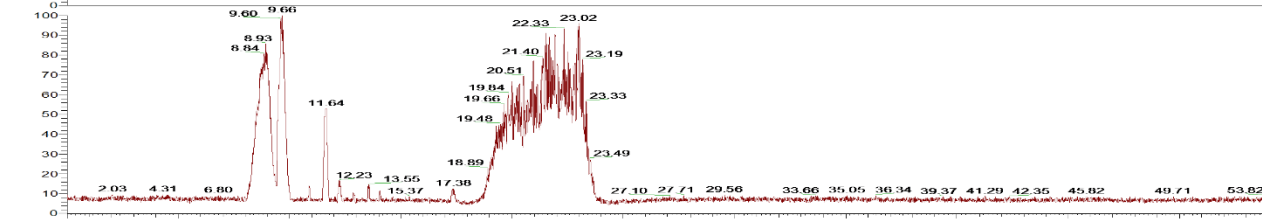

NL: 3.45E5  
 Base Peak F: Full ms MS  
 20230611\_GGGGLG1mg-  
 2mM +K3PO4-mg-2M+  
 Ar4unStr+  
 RT8H\_ScavgerH3PO4\_C18\_Ly  
 optimization1\_Sample\_1-1

20230611\_GGGGLG1mg-2mM+K3PO4-mg-2M+Ar4unStr+RT8H\_ScavgerH3PO4\_C18\_Lyophil:Time (min) Sample\_1-1 #1830-2151 RT: 8.15-9.59 AV: 322 NL: 1.36E5  
 T: FTMS + p NSI Full ms [400.0000-2000.0000]

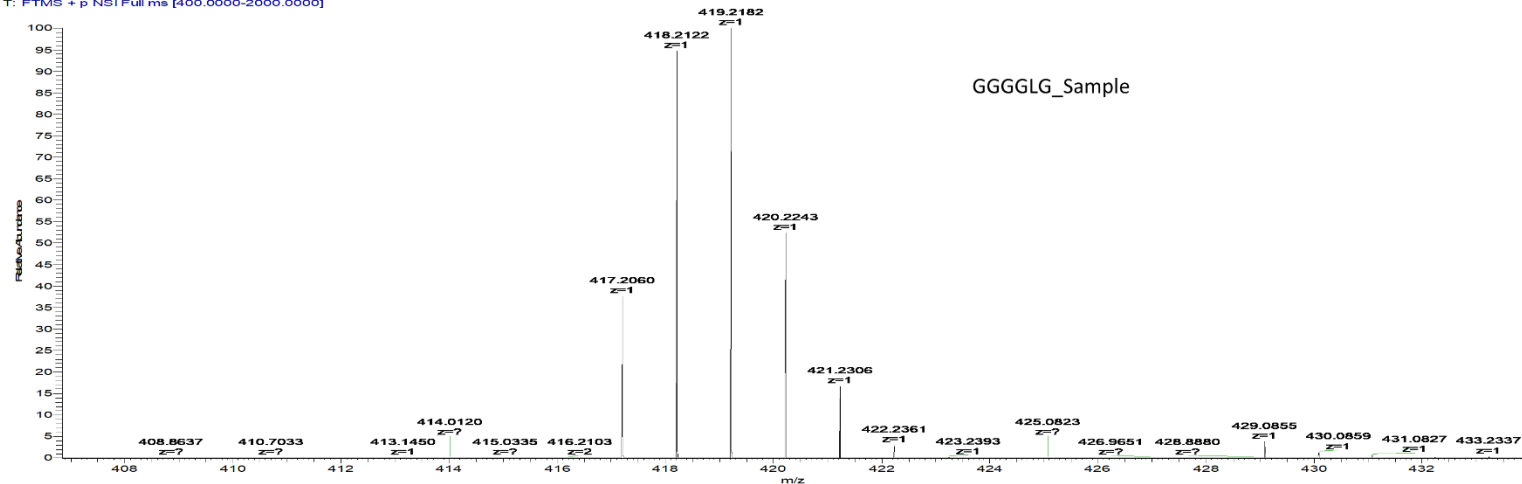



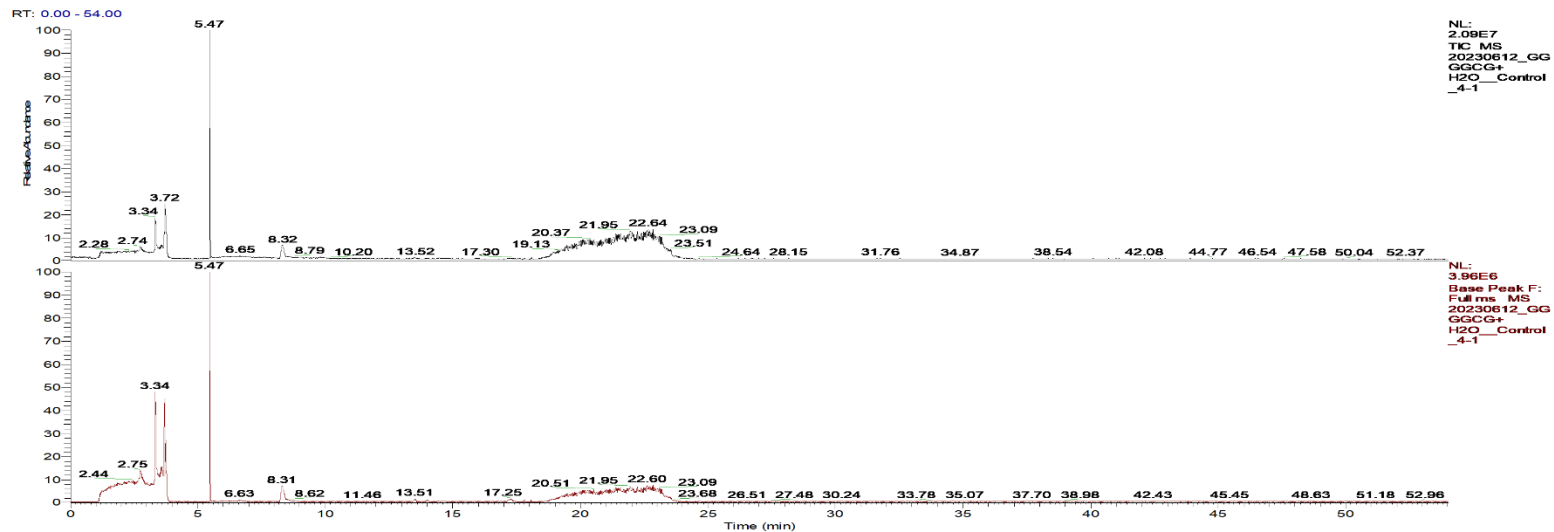

20230612\_GGGGCG+H2O\_Control\_4-1 #833 RT: 3.71 AV: 1 NL: 1.18E6  
 T: FTMS + p NSI Full ms [400.0000-2000.0000]

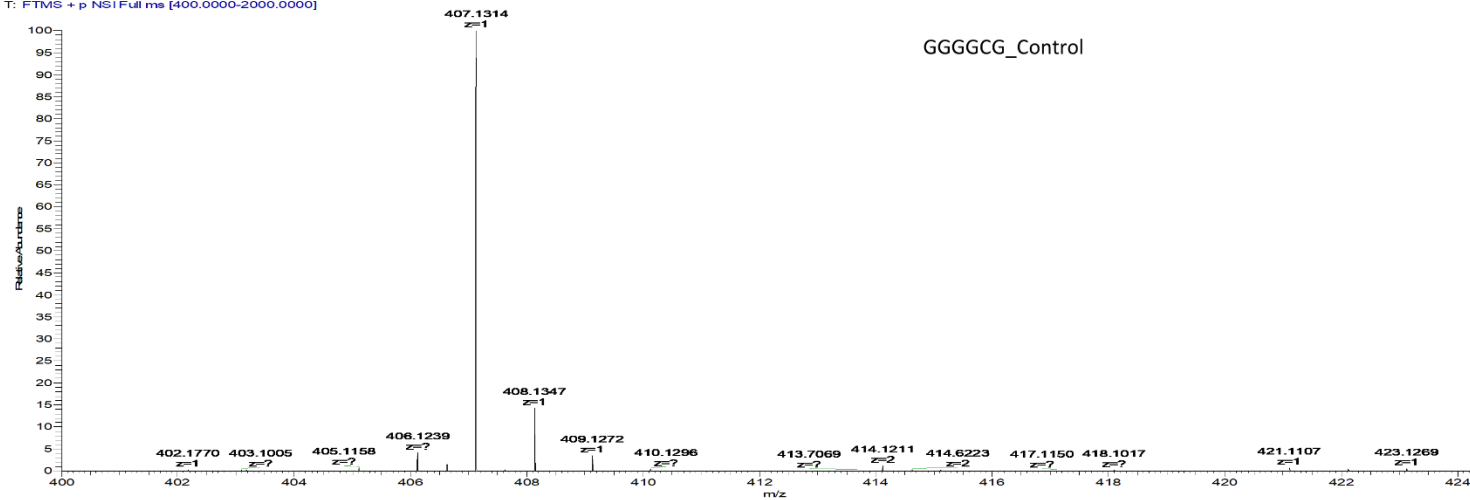

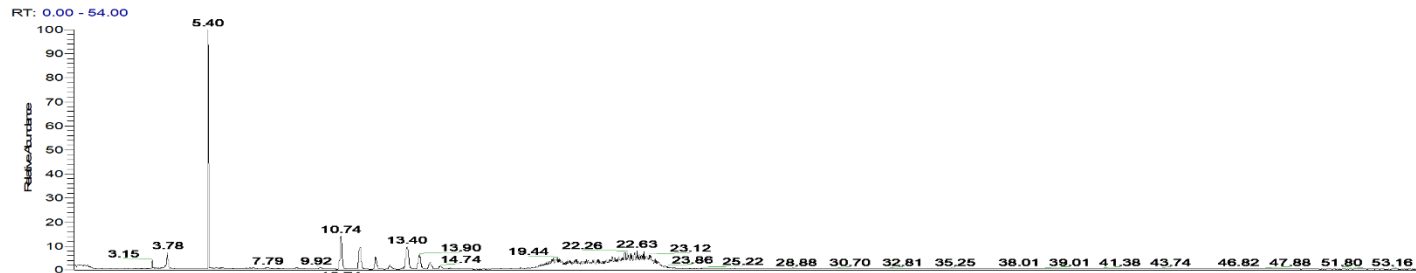

NL: 9.89E7  
 TIC MS  
 20230613\_GGGGCG1mg-  
 2mM\_+K3PO4-mg-2M+  
 Ar4unStir+  
 RT8H\_ScavgerH3PO4\_C18\_Ly  
 ophilization1\_\_Sample\_1-1

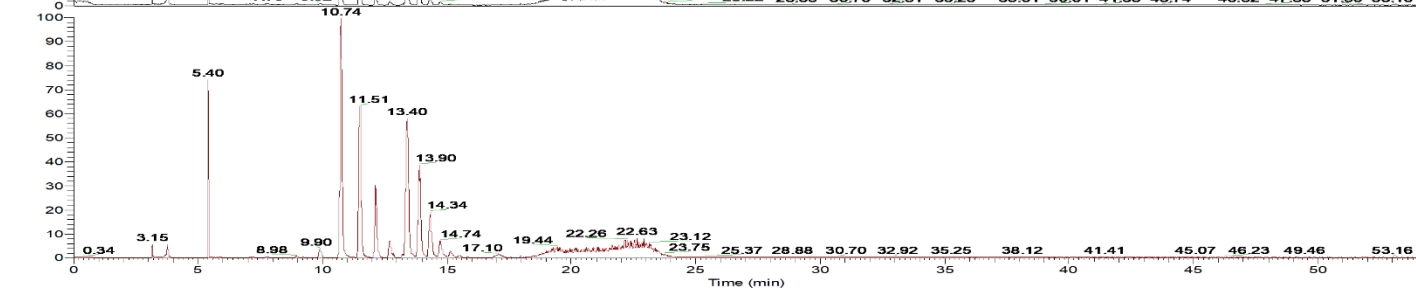

20230613\_GGGGCG1mg-2mM\_+K3PO4-mg-2M+Ar4unStir+RT8H\_ScavgerH3PO4\_C18\_Lyophlization1\_\_Sample\_1-1 #1213 RT: 5.40 AV: 1 NL: 7.73E6  
 T: FTMS + p NSI Full ms [400.0000-2000.0000]

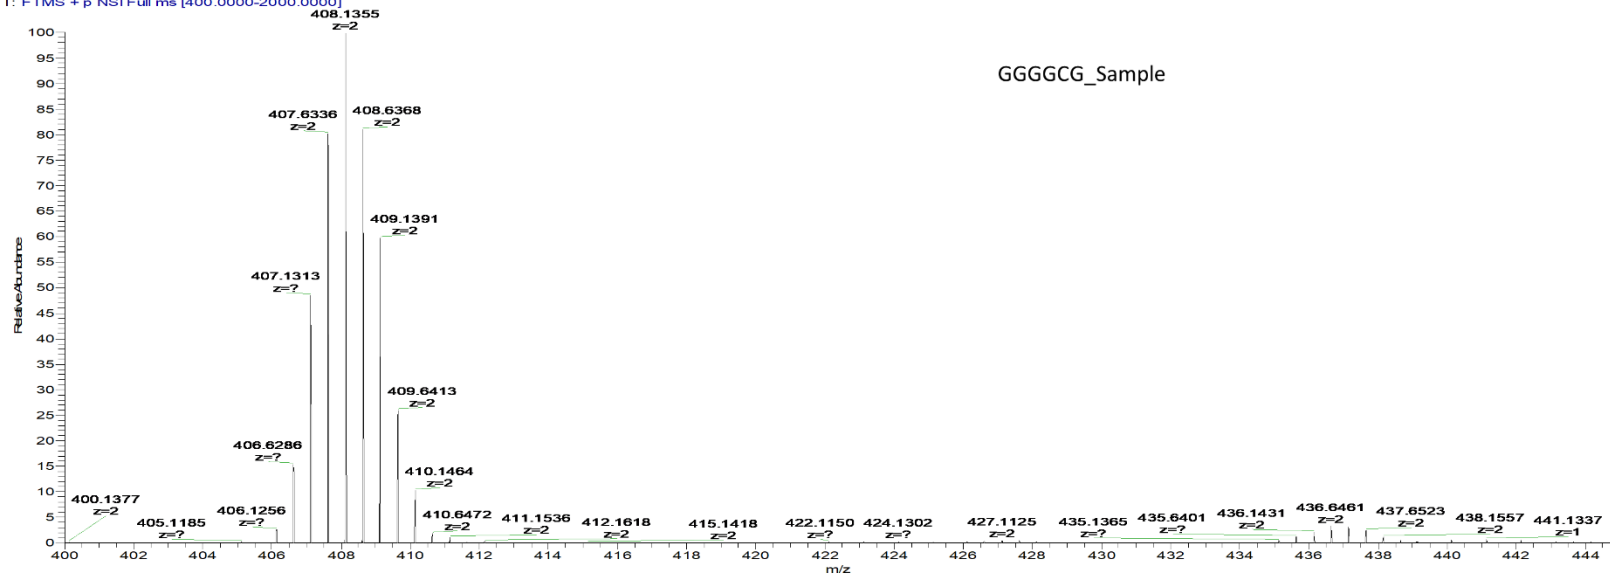

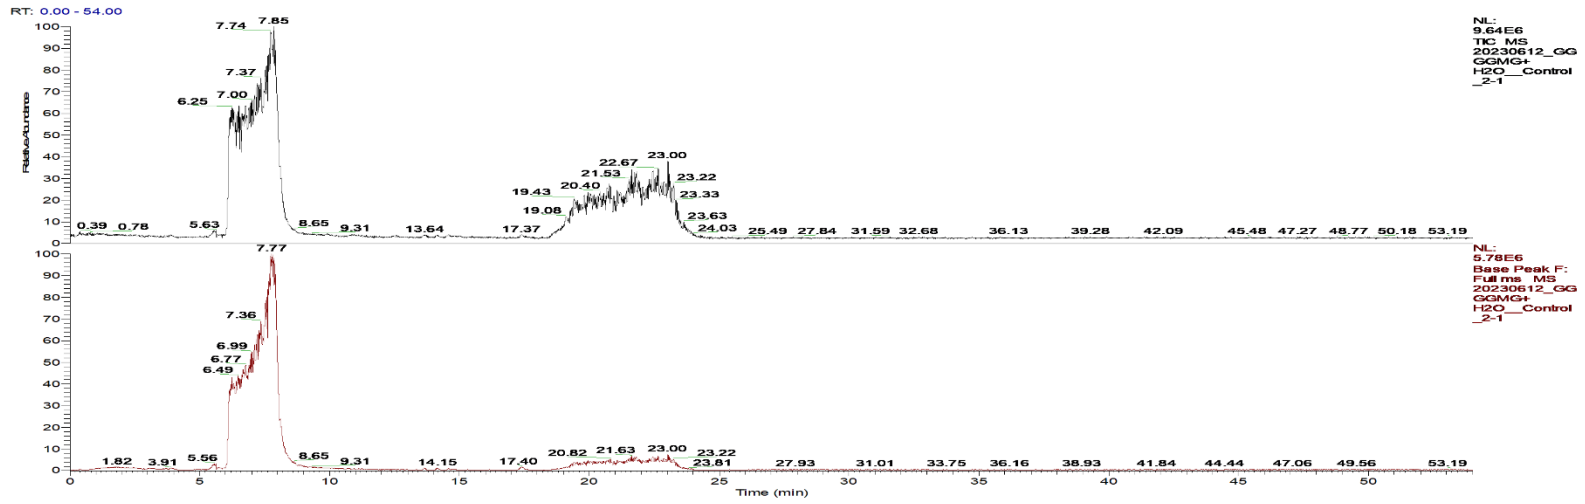

20230612\_GGGMG+H2O\_Control\_2-1 #1309-1844 RT: 5.83-8.22 AV: 536 NL: 2.51E6  
T: FTMS +p NSI Full ms [400.0000-2000.0000]

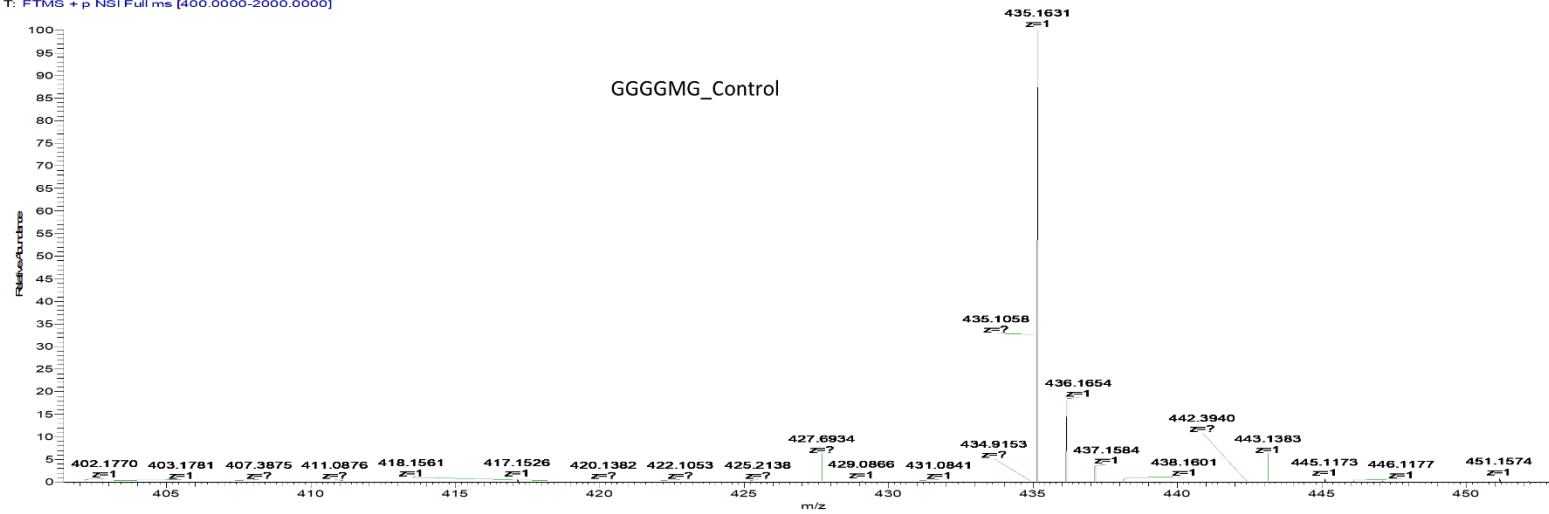

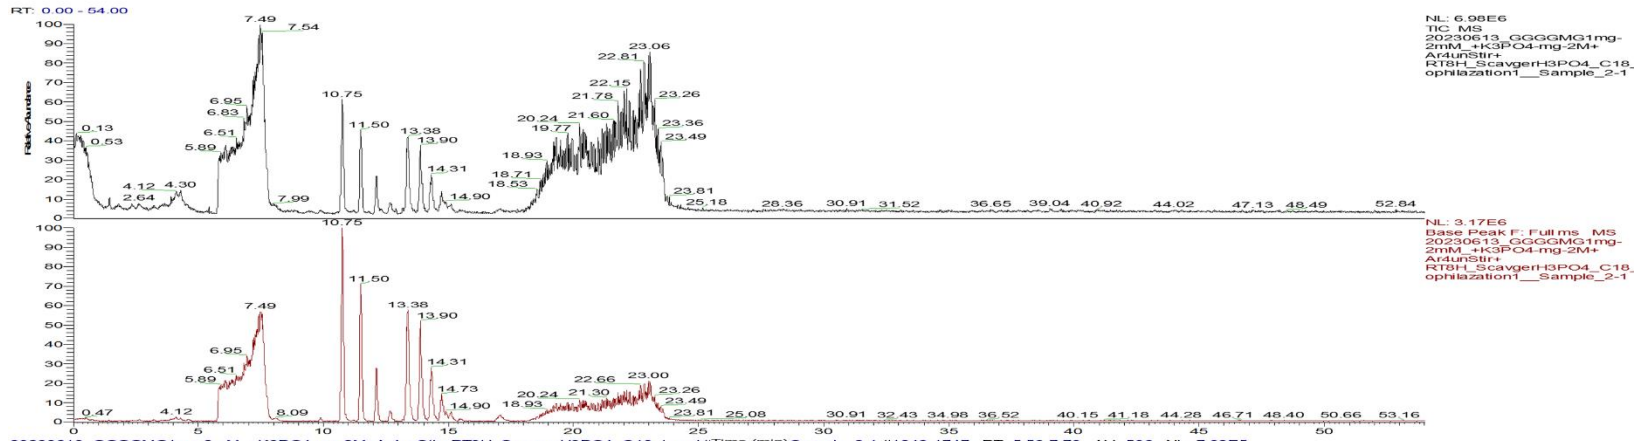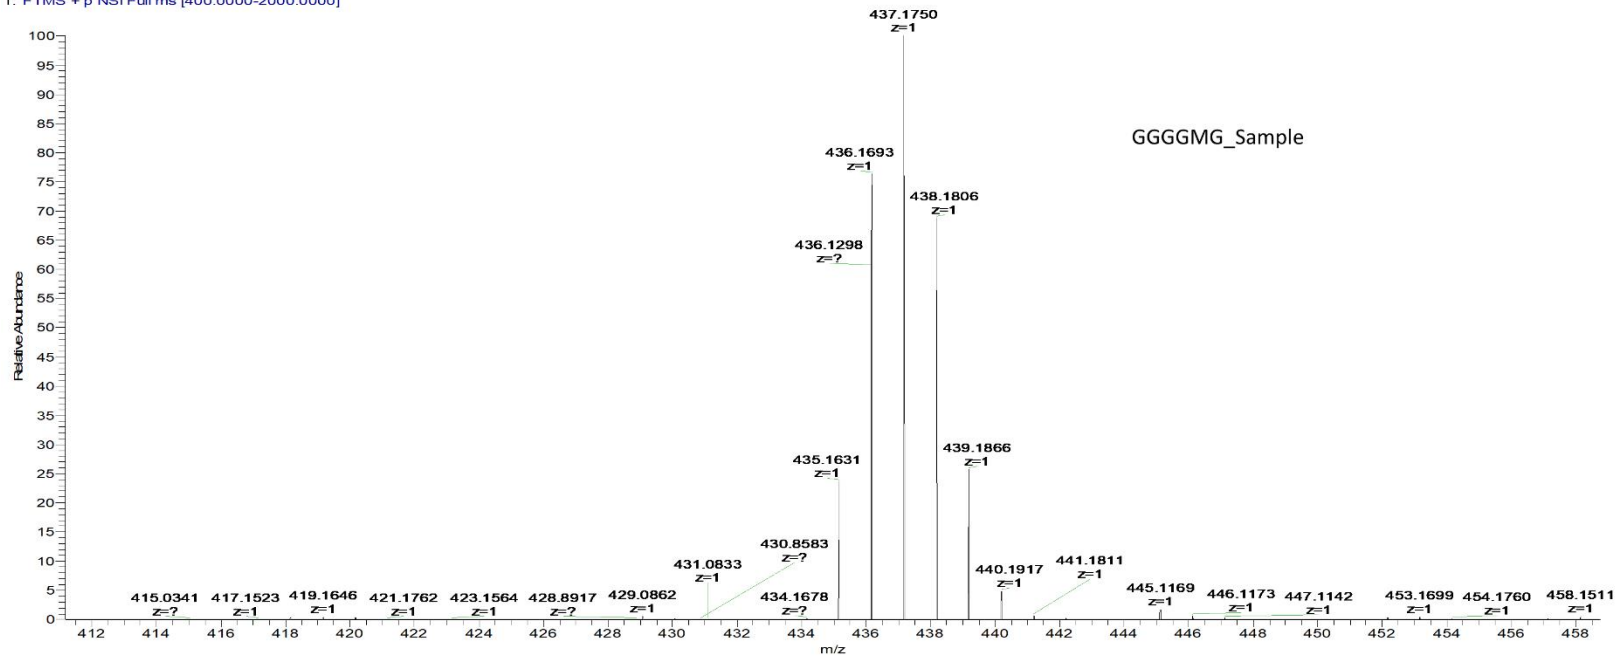

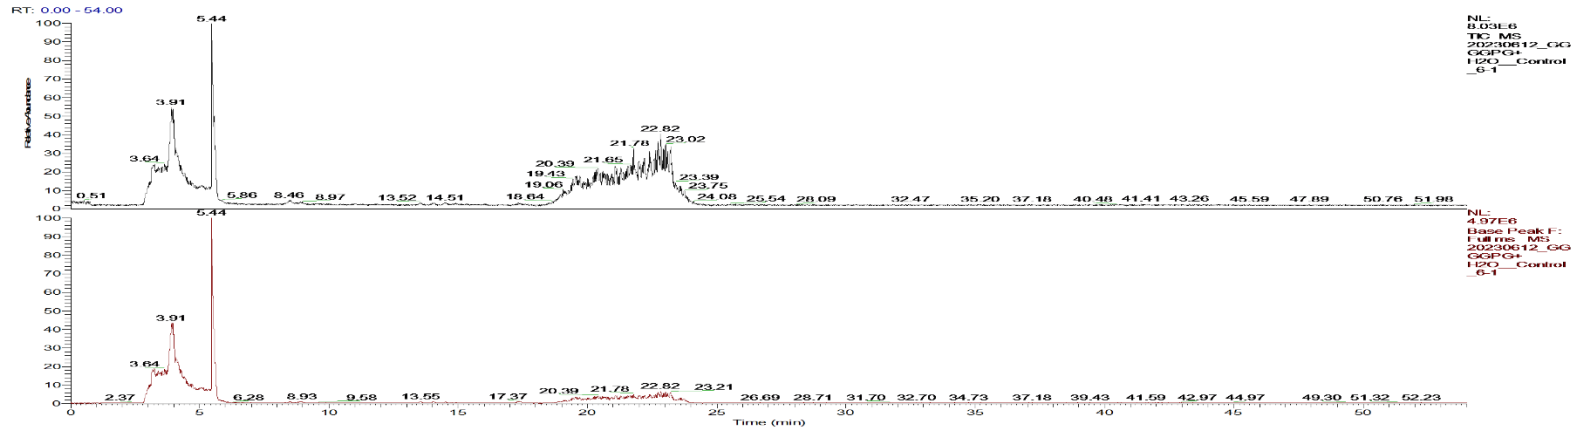

20230612\_GGGPG+H2O\_Control\_6-1 #876 RT: 3.90 AV: 1 NL: 2.07E6  
T: FTMS +p NSI Full ms [400.0000-2000.0000]

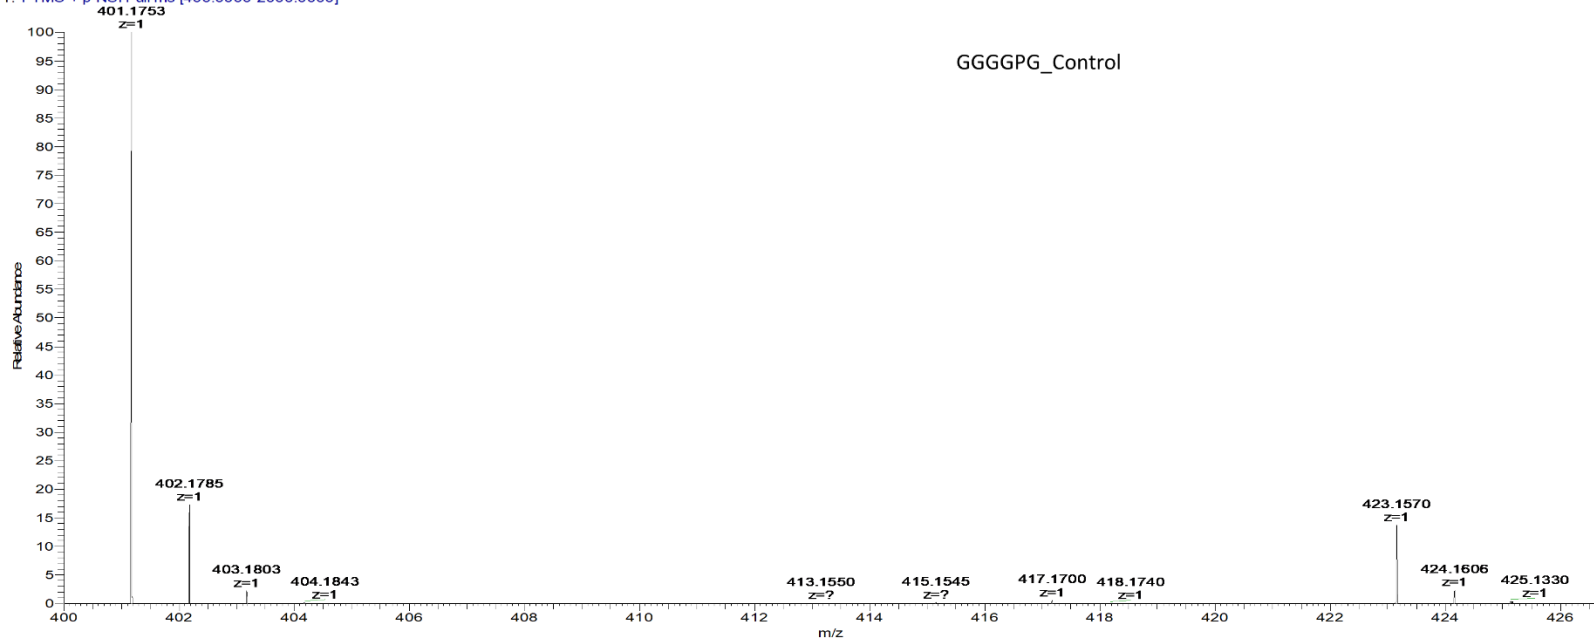

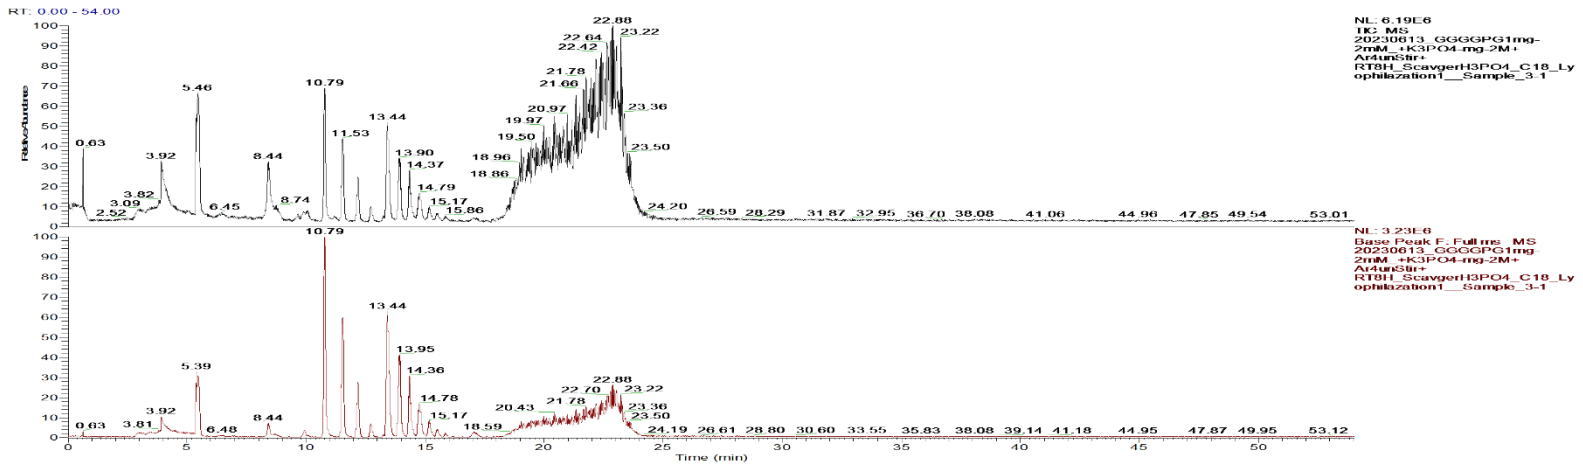

20230613\_GGGGPG1mg-2mM\_+K3PO4.mg.2M+Ar4unStir+RT8H\_ScavgerH3PO4\_C18\_Lyophilization1\_Sample\_3-1 #690 RT: 3.07 AV: 1 NL: 6.64E4  
 T: FTMS +p NSI Full ms [400.0000-2000.0000]

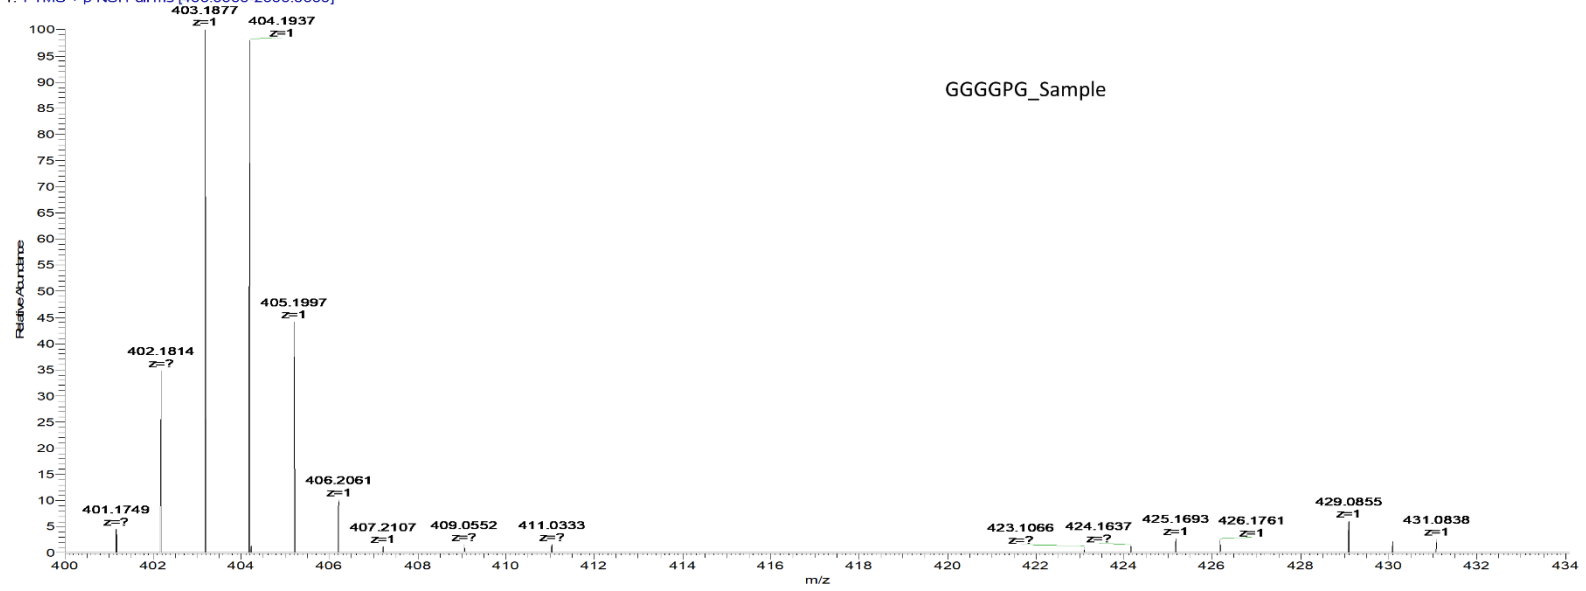

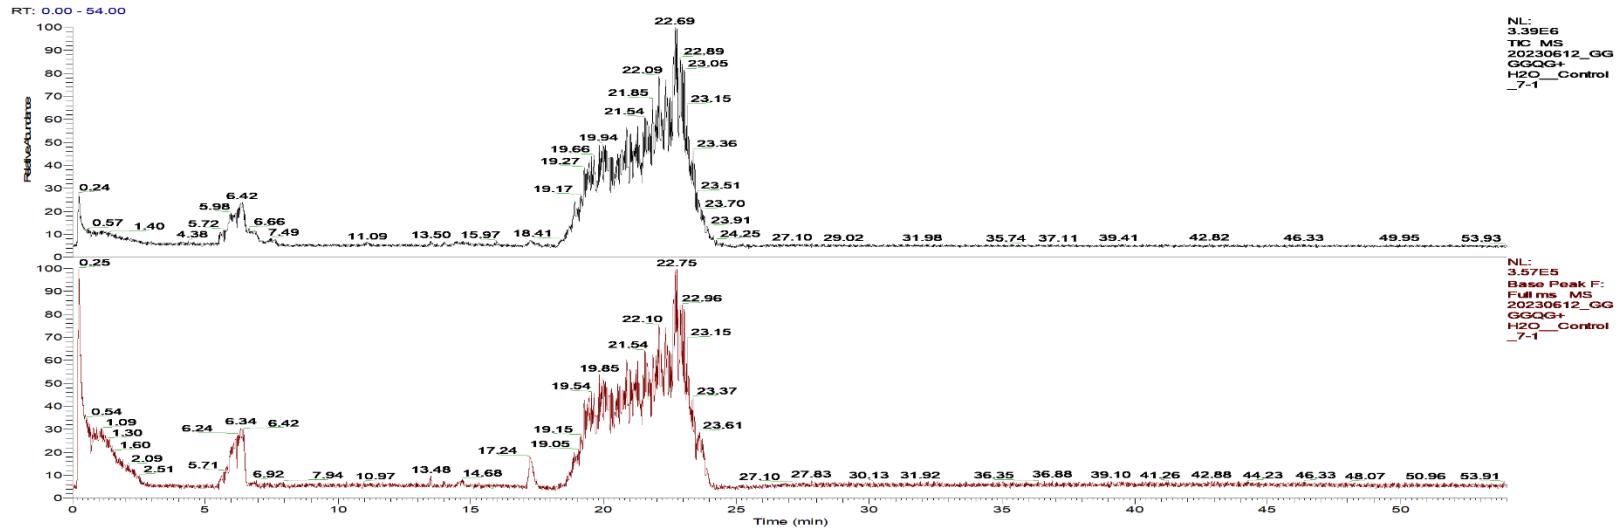

20230612\_GGGGQG+H2O\_Control\_7-1 #103 RT: 0.46 AV: 1 NL: 1.23E5  
T: FTMS +p NSI Full ms [400.0000-2000.0000]

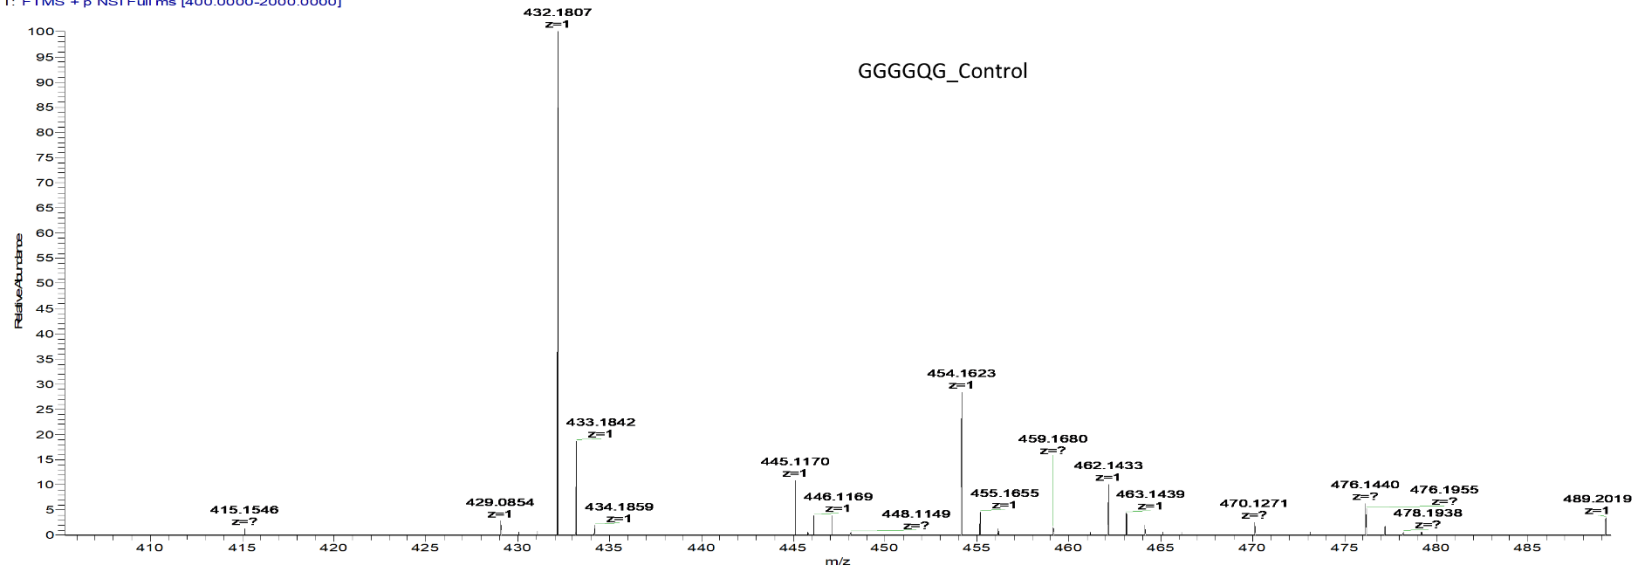

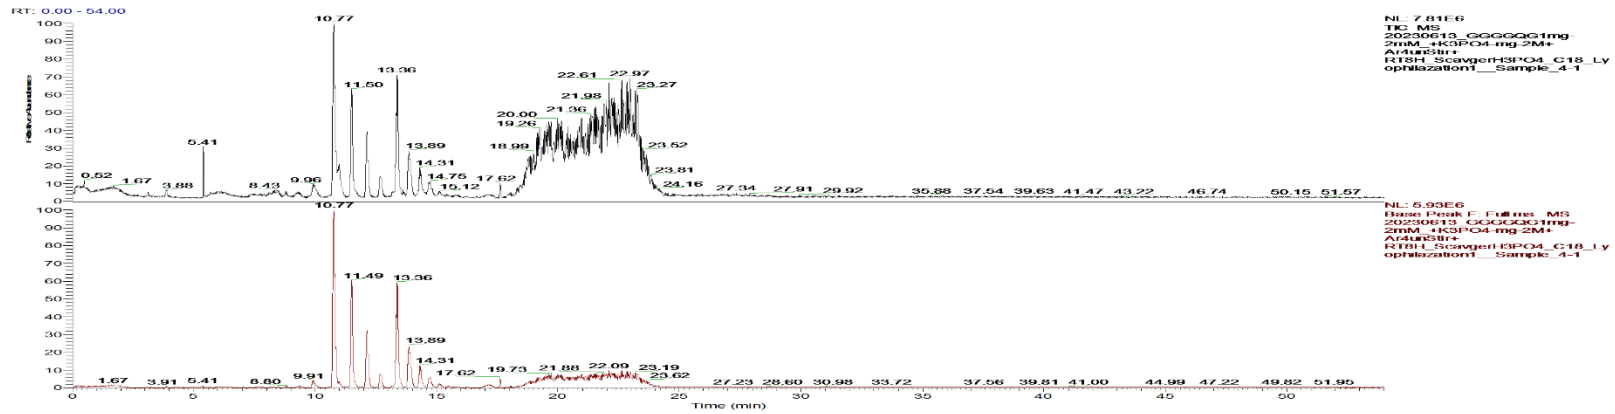

20230613\_GGGGQG1mg-2mM\_+K3PO4-mg-2M+Ar4unStir+RT8H\_ScavengerH3PO4\_C18\_Lyophilization1\_Sample\_4-1 #267 RT: 1.19 AV: 1 NL: 5.31E4 T: FTMS + p NSI Full ms [400.0000-2000.0000]

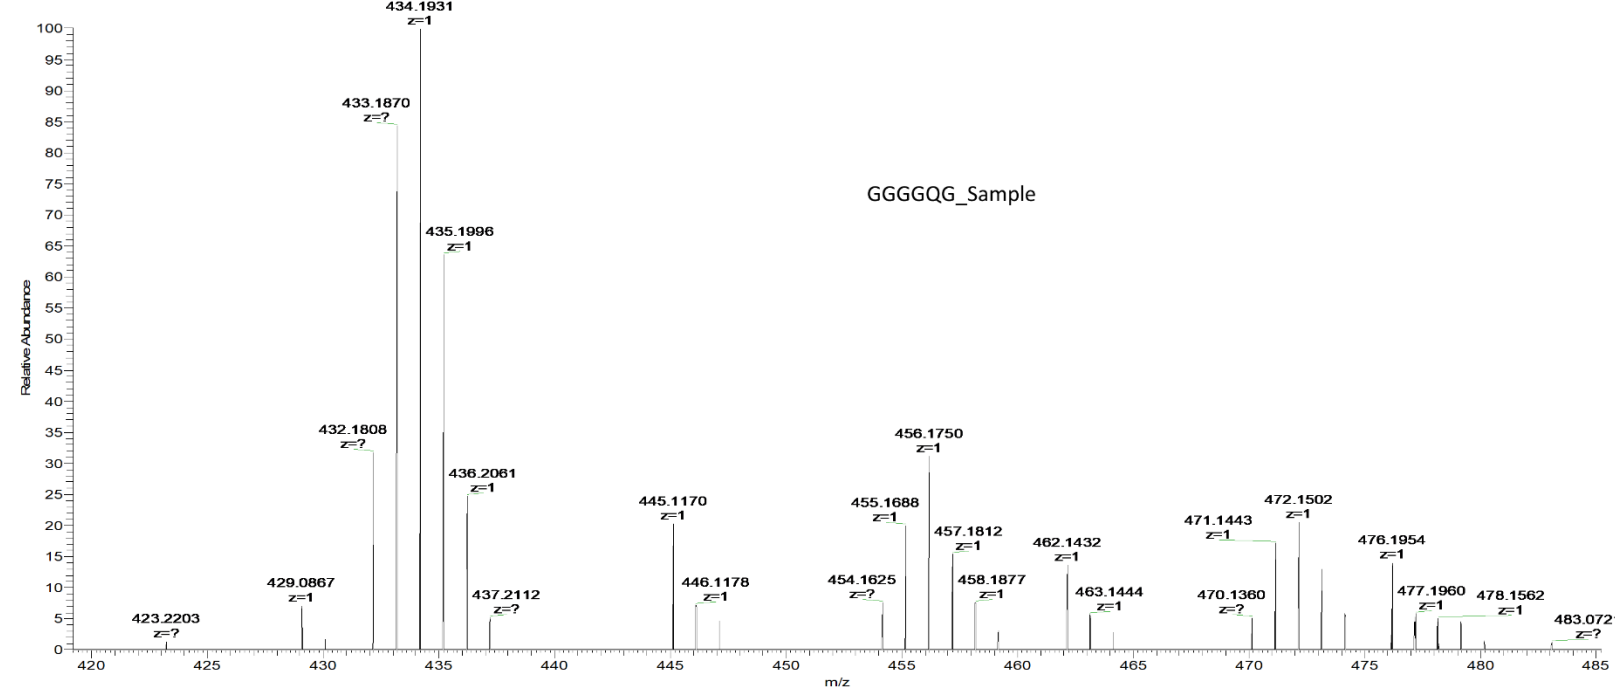



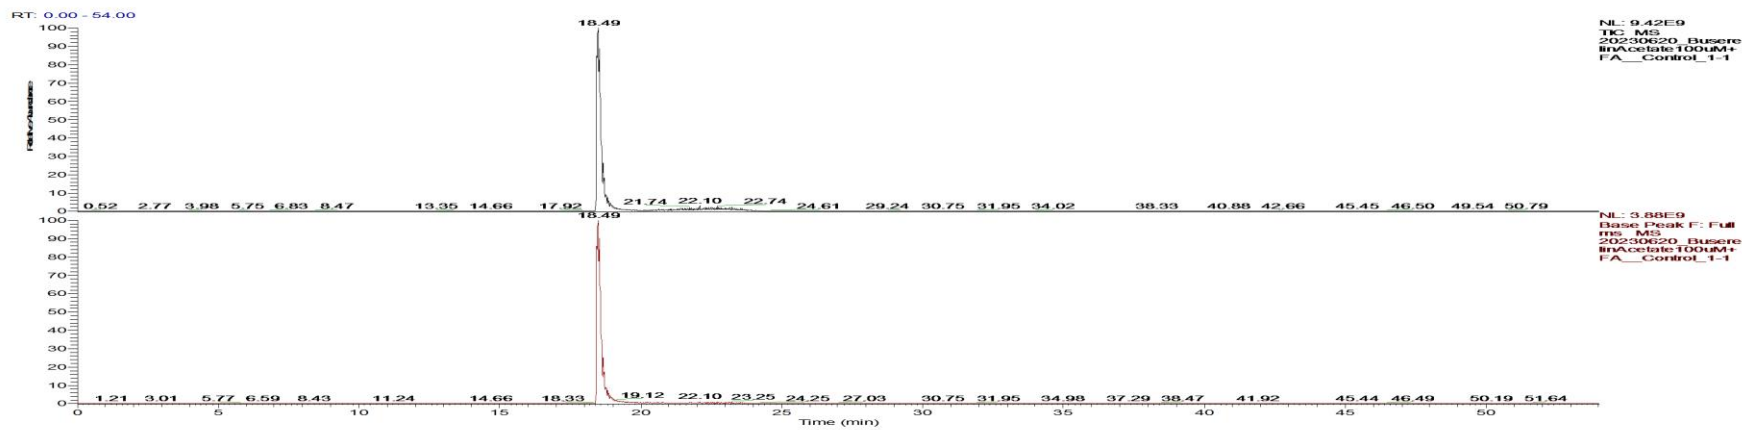

20230620\_BuserelinAcetate100uM+FA\_Control\_1-1 #4088-4235 RT: 18.22-18.87 AV: 148 NL: 9.61E8  
T: FTMS + p NSI Full ms [400.0000-2000.0000]

BuserelinAcetate\_Control

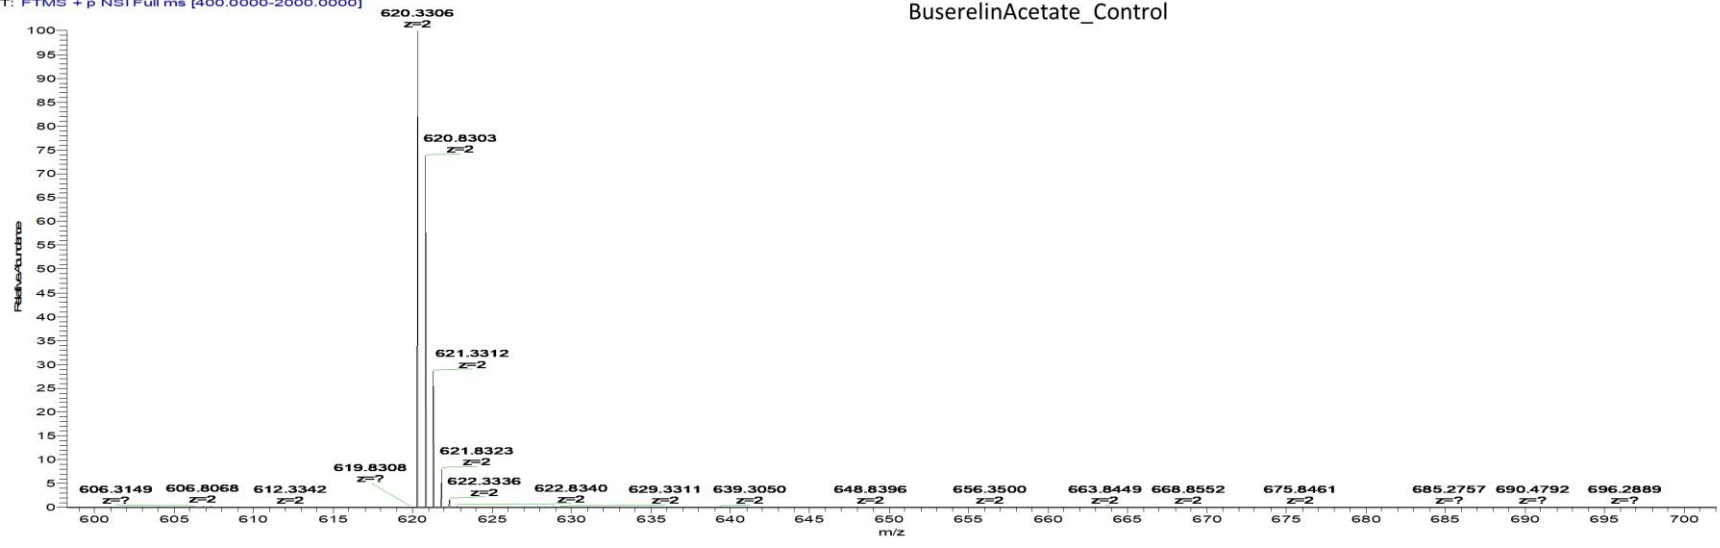

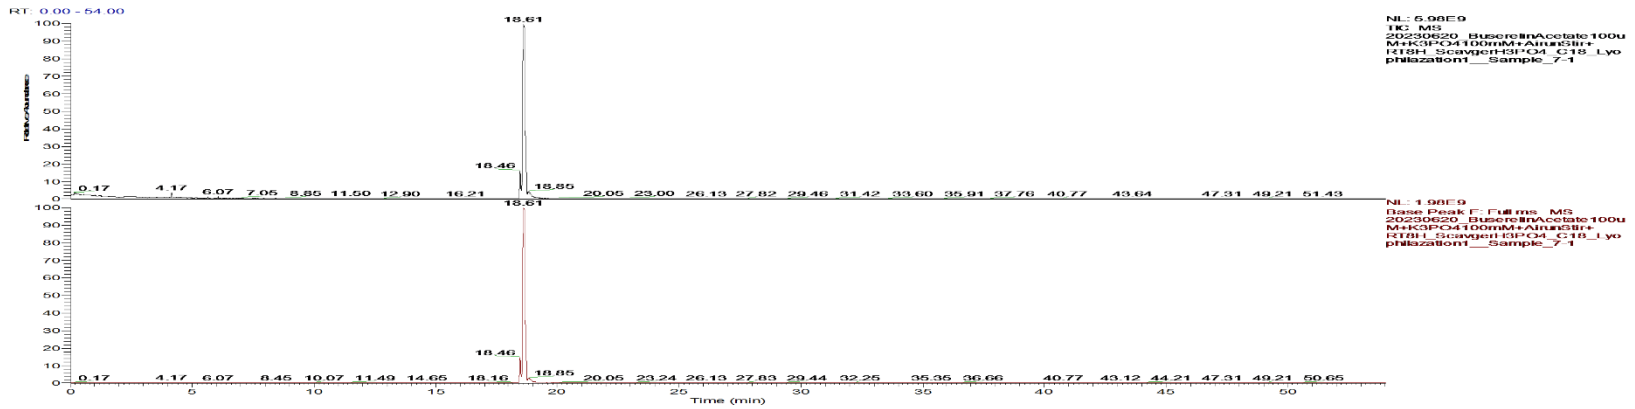

20230620\_BuserelinAcetate100uM+K3PO4100mM+AiruStir+RT8H\_ScavgerH3PO4\_C18\_Lyophilization1\_Sample\_7-1 #2695-4733 RT: 12.01-21.09 AV: 2039 NL: 2.37E7  
 T: FTMS + p NSI Full ms [400.0000-2000.0000]

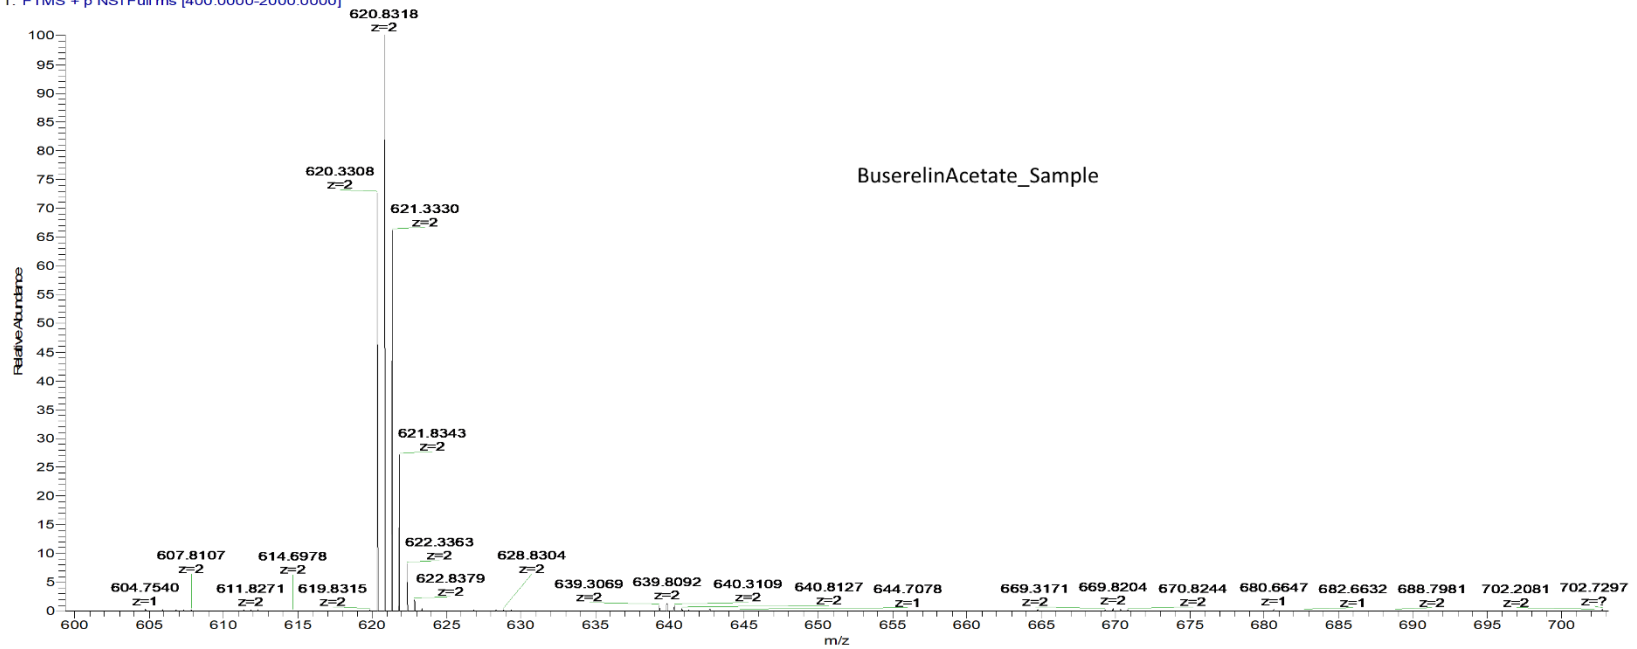

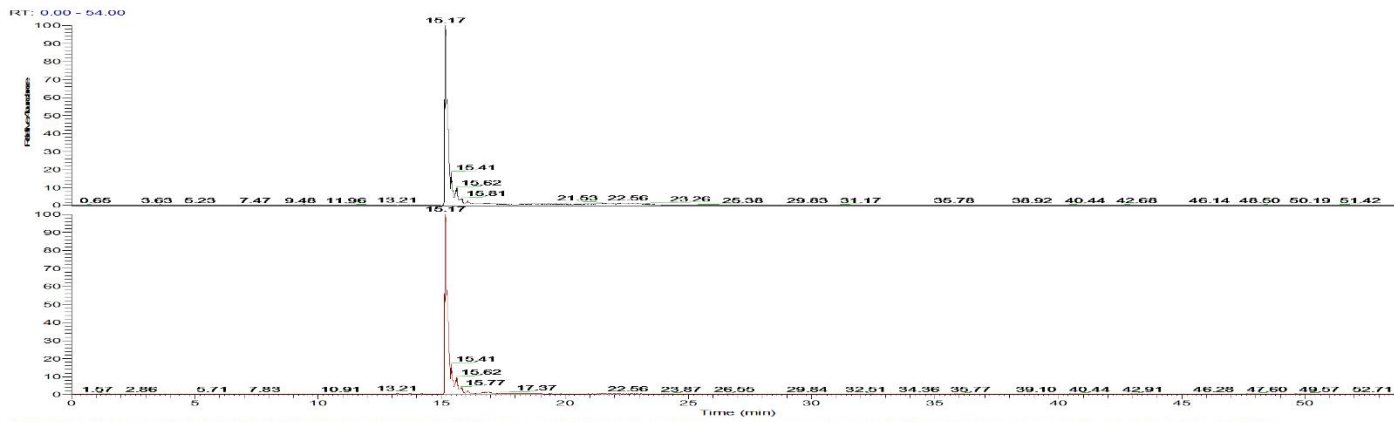

NL: 119E9  
 1K5 MS  
 20230616\_Octrotide100uM+  
 NH4-3-PO4100mM+AirunStir+  
 RT2H\_ScavgerH3PO4\_C18\_Ly  
 ophilization1\_Sample\_3-1

NL: 483E8  
 Base Peak F: Full ms MS  
 20230616\_Octrotide100uM+  
 NH4-3-PO4100mM+AirunStir+  
 RT2H\_ScavgerH3PO4\_C18\_Ly  
 ophilization1\_Sample\_3-1

20230616\_Octrotide100uM+NH4-3-PO4100mM+AirunStir+RT2H\_ScavgerH3PO4\_C18\_Lyophilization1\_Sample\_3-1 #3166-3756 RT: 14.11-16.74 AV: 591 NL: 2.70E7  
 T: FTMS + p NSI Full ms [400.0000-2000.0000]

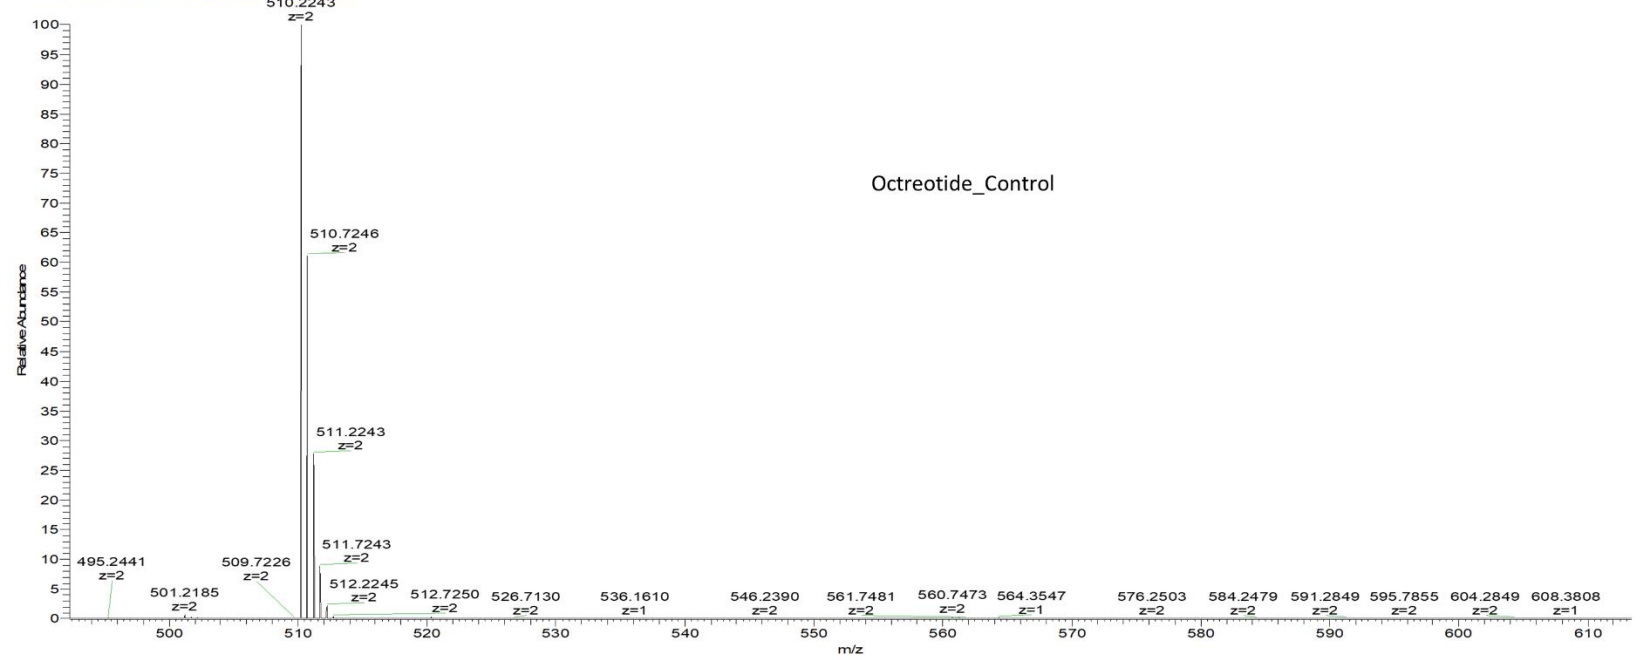

Octreotide\_Control

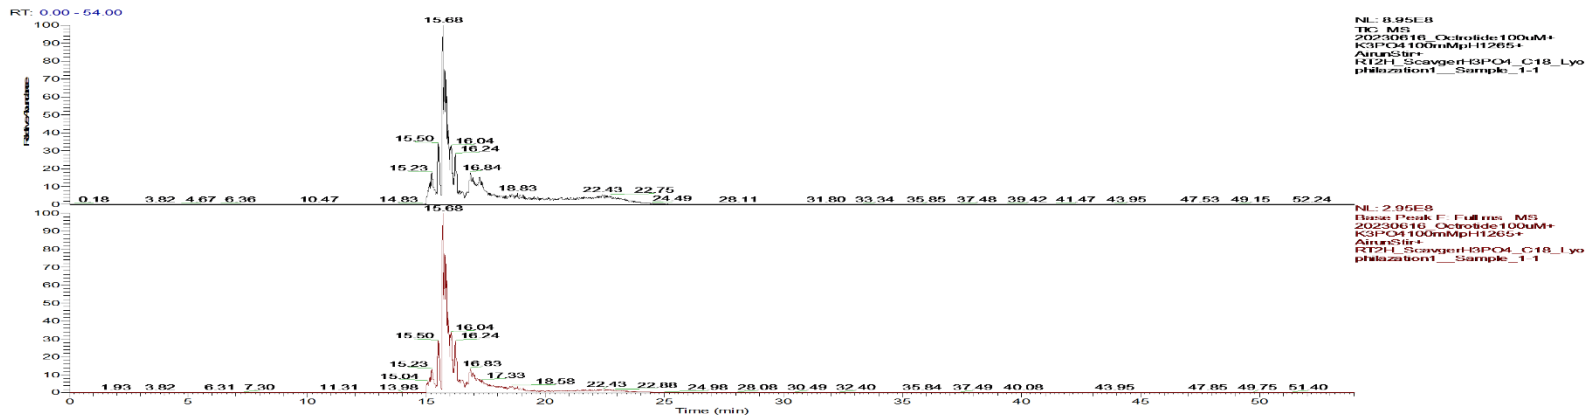

20230616\_Octrotide 100uM+K3PO4 100mM pH 12.65+ArunStir+RT2H\_Scavger-H3PO4\_C18\_Lyophilization1\_\_Sample\_1-1 #2695-4733 RT: 12.01-21.09 AV: 2039 NL: 1.37E7

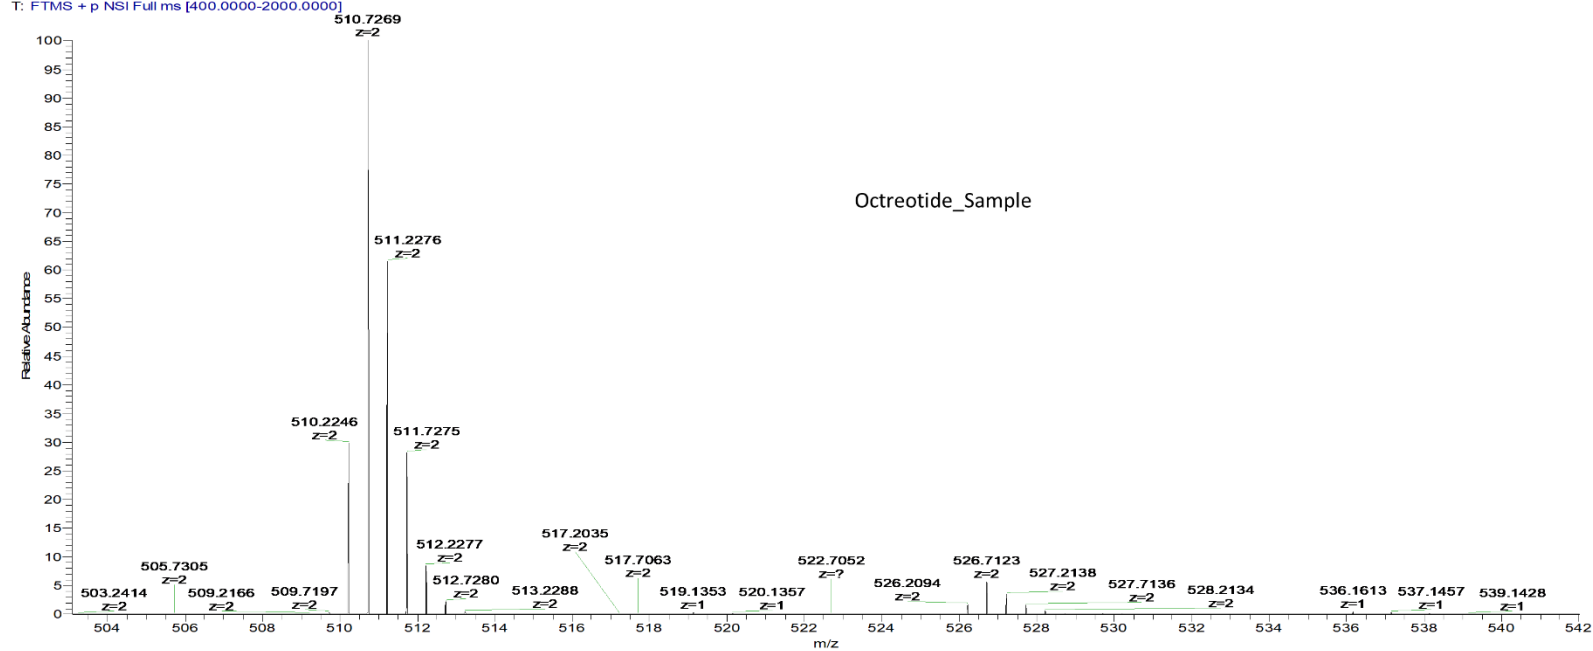

20230308\_20230227\_Mb10uM\_200mMNH4OAC\_Control\_1-1#20 RT: 0.21 AV: 1 NL: 1.91E7  
T: FTMS +p NSI sid=15.00 cv=15.00 Full ms [400.0000-3500.0000]

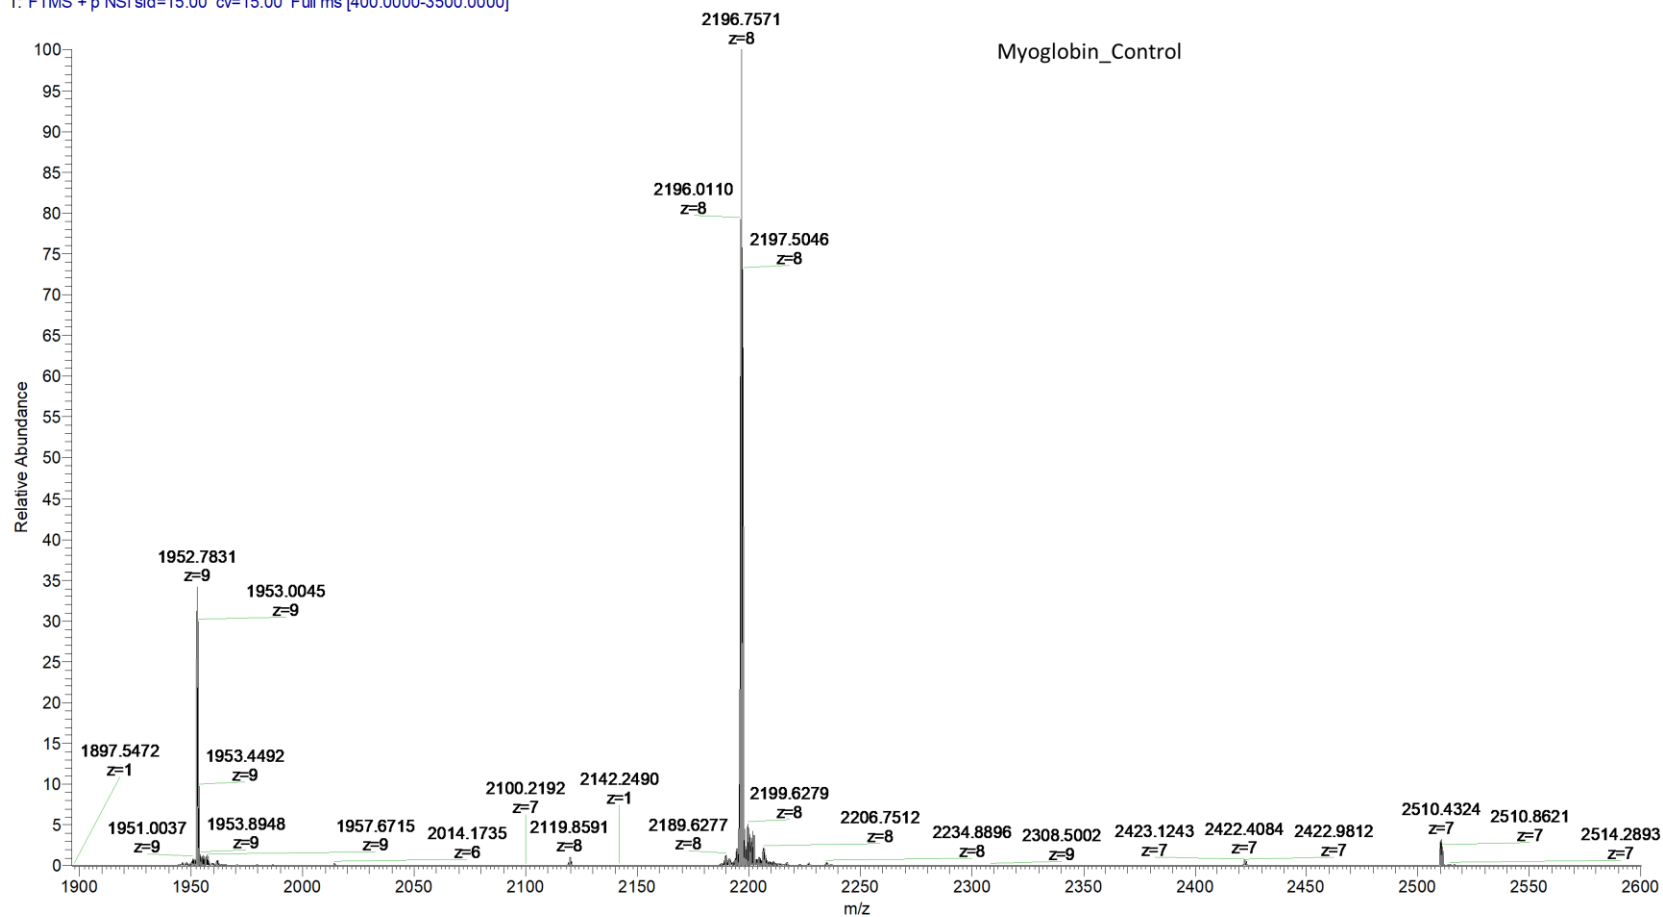

20230308\_20230227\_Mb10uM\_200mMNH4OAC\_z8\_2196\_Control\_1\_1#20 RT: 0.23 AV: 1 NL: 4.22E6  
T: FTMS +p NSI sid=15.00 cv=15.00 Full ms2 2196.7000@cid1.00 [200.0000-3500.0000]

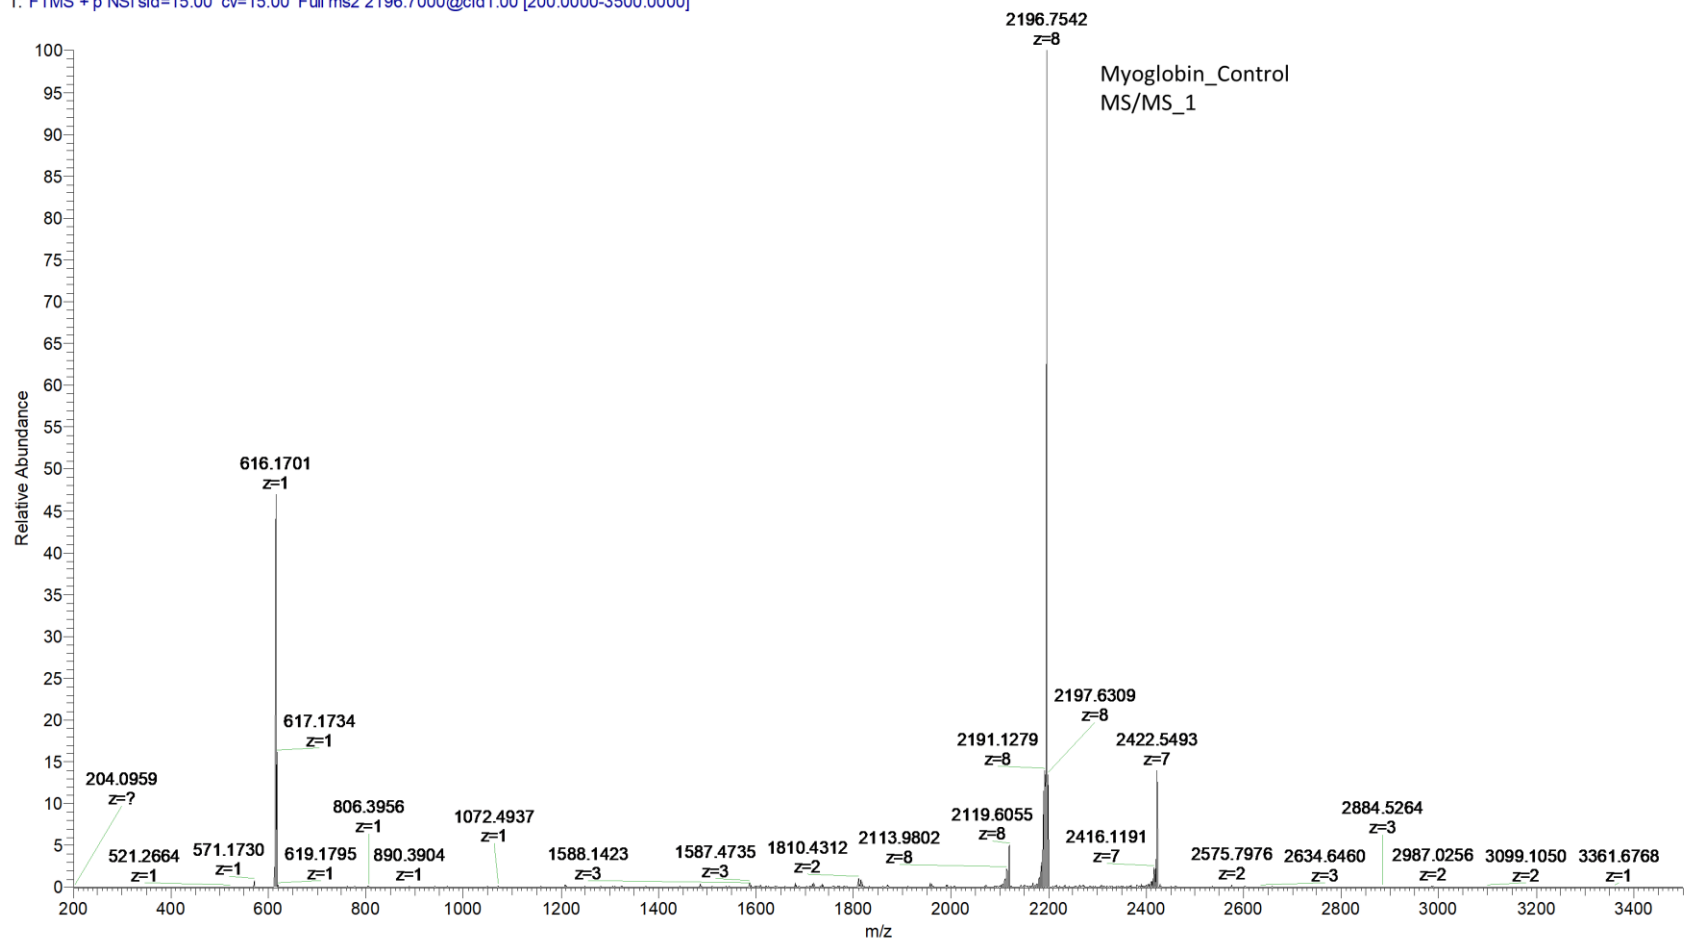

20230308\_20230227\_Mb10uM\_200mMNH4OAC\_z8\_2196\_Control\_1\_2#20 RT: 0.23 AV: 1 NL: 4.25E6  
T: FTMS +p NSI sid=15.00 cv=15.00 Full ms2 2196.7000@cid1.00 [200.0000-3500.0000]

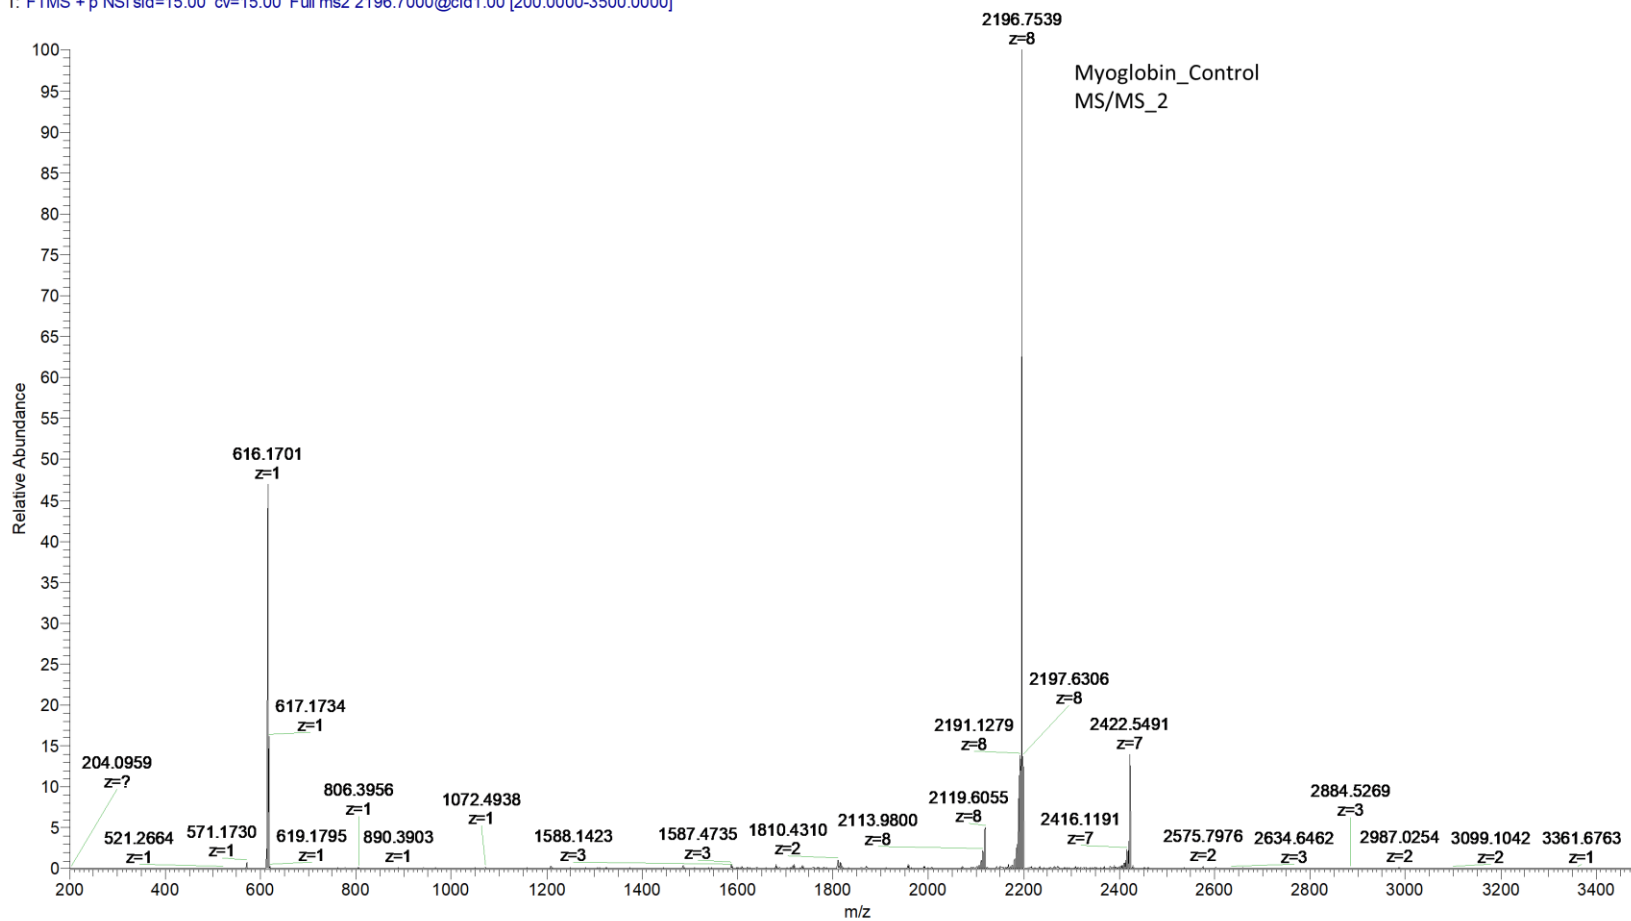

20230308\_20230227\_Mb10uM\_200mMNH4OAC\_z8\_2196\_Control\_1\_3#20 RT: 0.23 AV: 1 NL: 4.25E6  
T: FTMS + p NSI sid=15.00 cv=15.00 Full ms2 2196.7000@cid1.00 [200.0000-3500.0000]

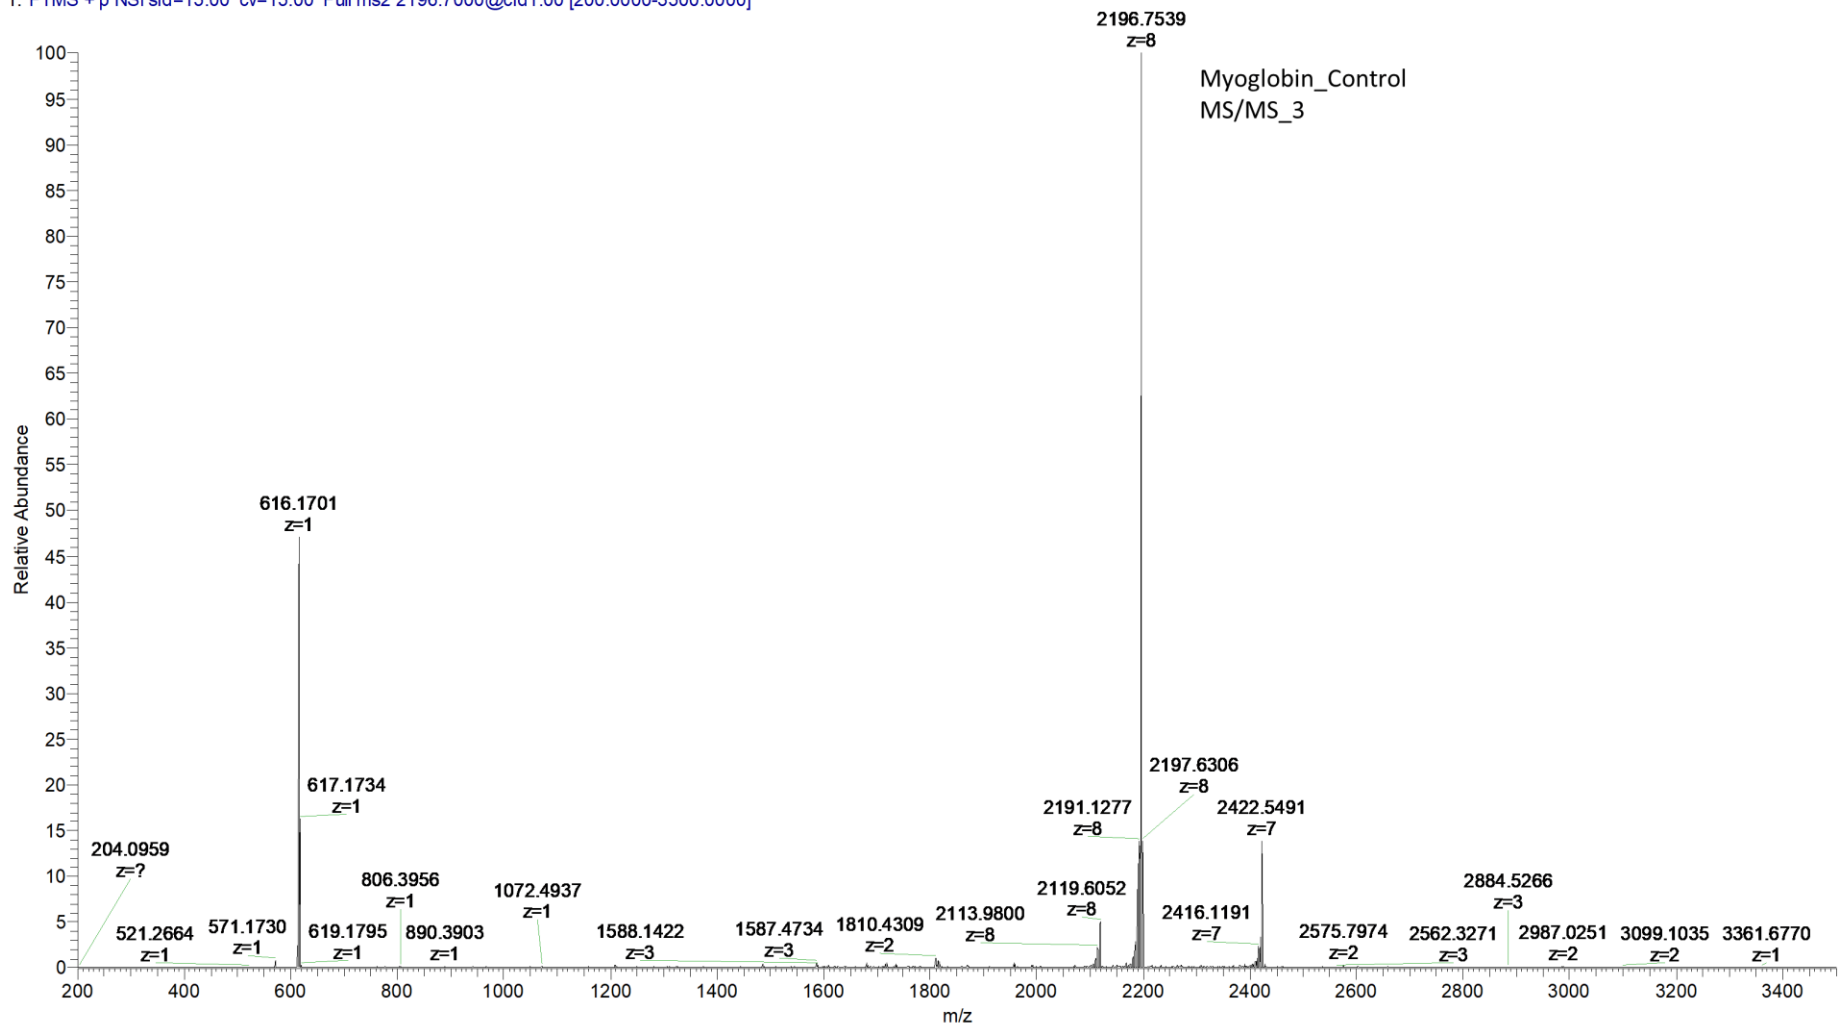



20230308\_20230227\_Mb10uM+100mMK3PO4+Ar+RT2H\_Sample\_1\_1 #20 RT: 0.21 AV: 1 NL: 3.52E6  
T: FTMS +p NSI sid=15.00 cv=15.00 Full ms [400.0000-3500.0000]

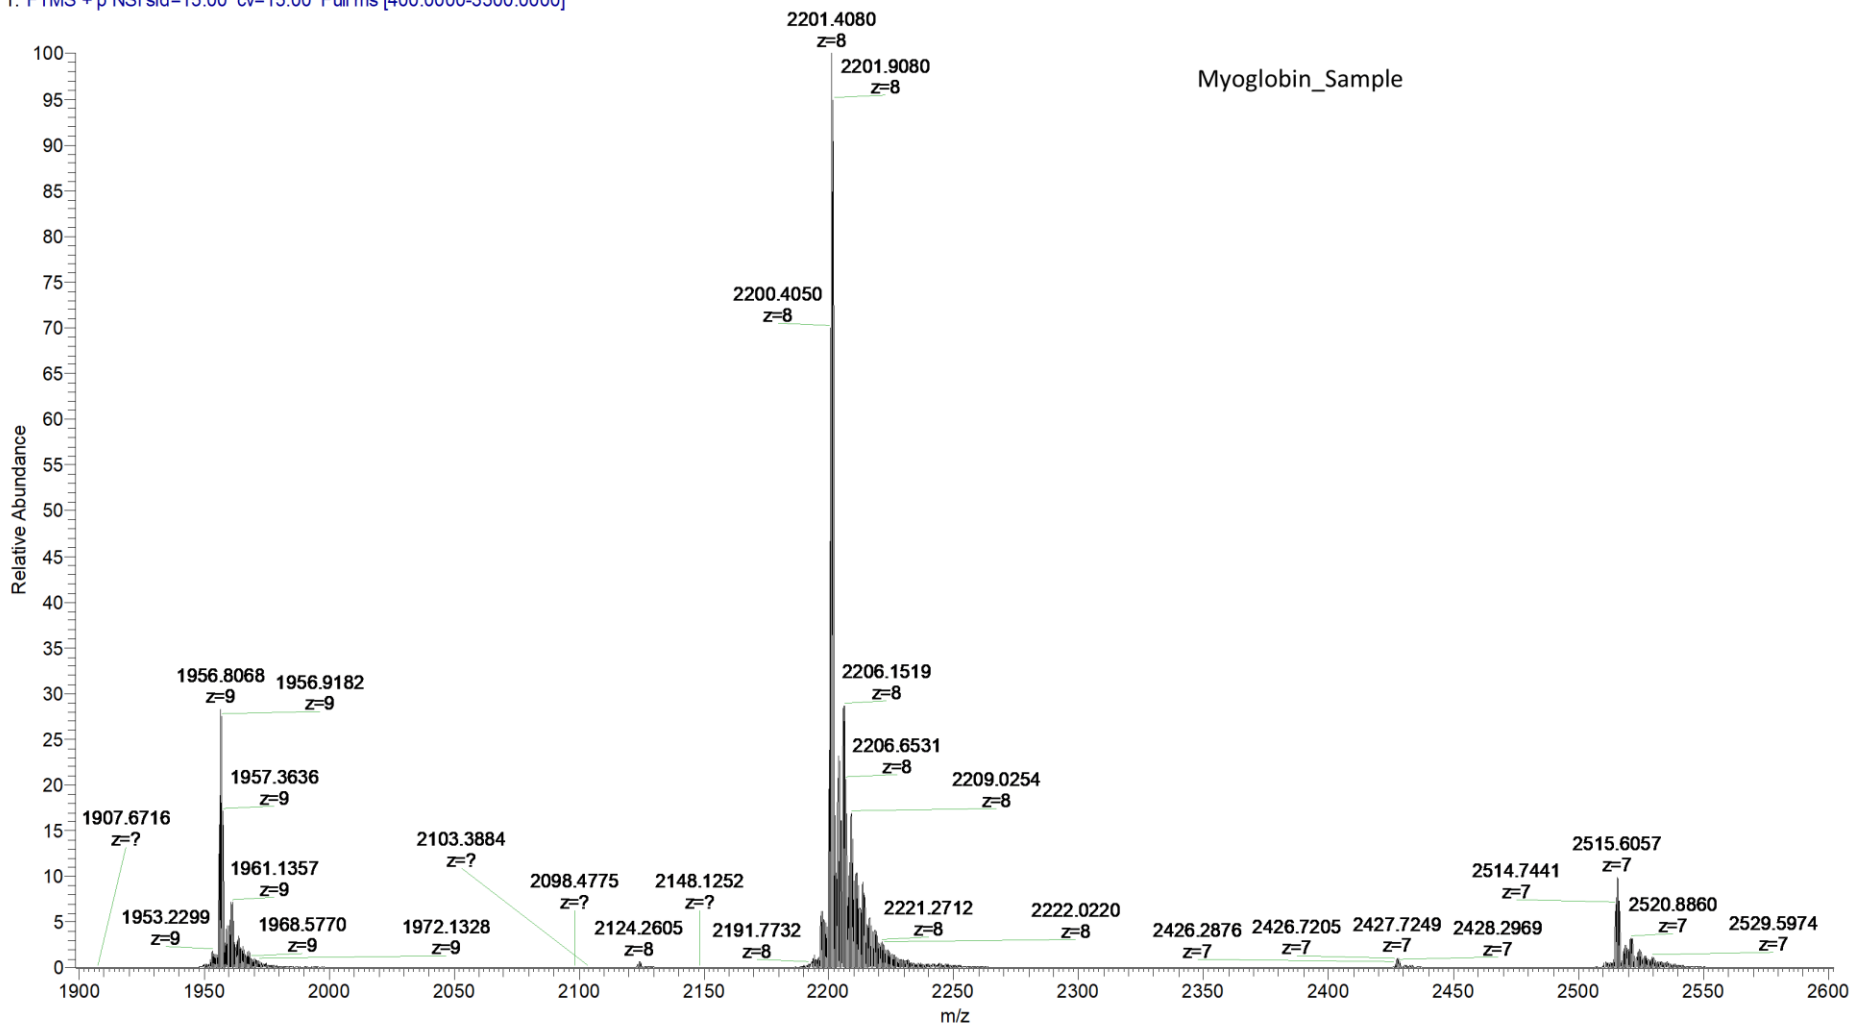

20230308\_20230227\_Mb10uM+100mMK3PO4+Ar+RT2H\_z8\_2201\_Sample\_1\_1#20 RT: 0.24 AV: 1 NL: 1.07E6  
T: FTMS + p NSI sid=15.00 cv=15.00 Full ms2 2201.3999@cid1.00 [200.0000-3500.0000]

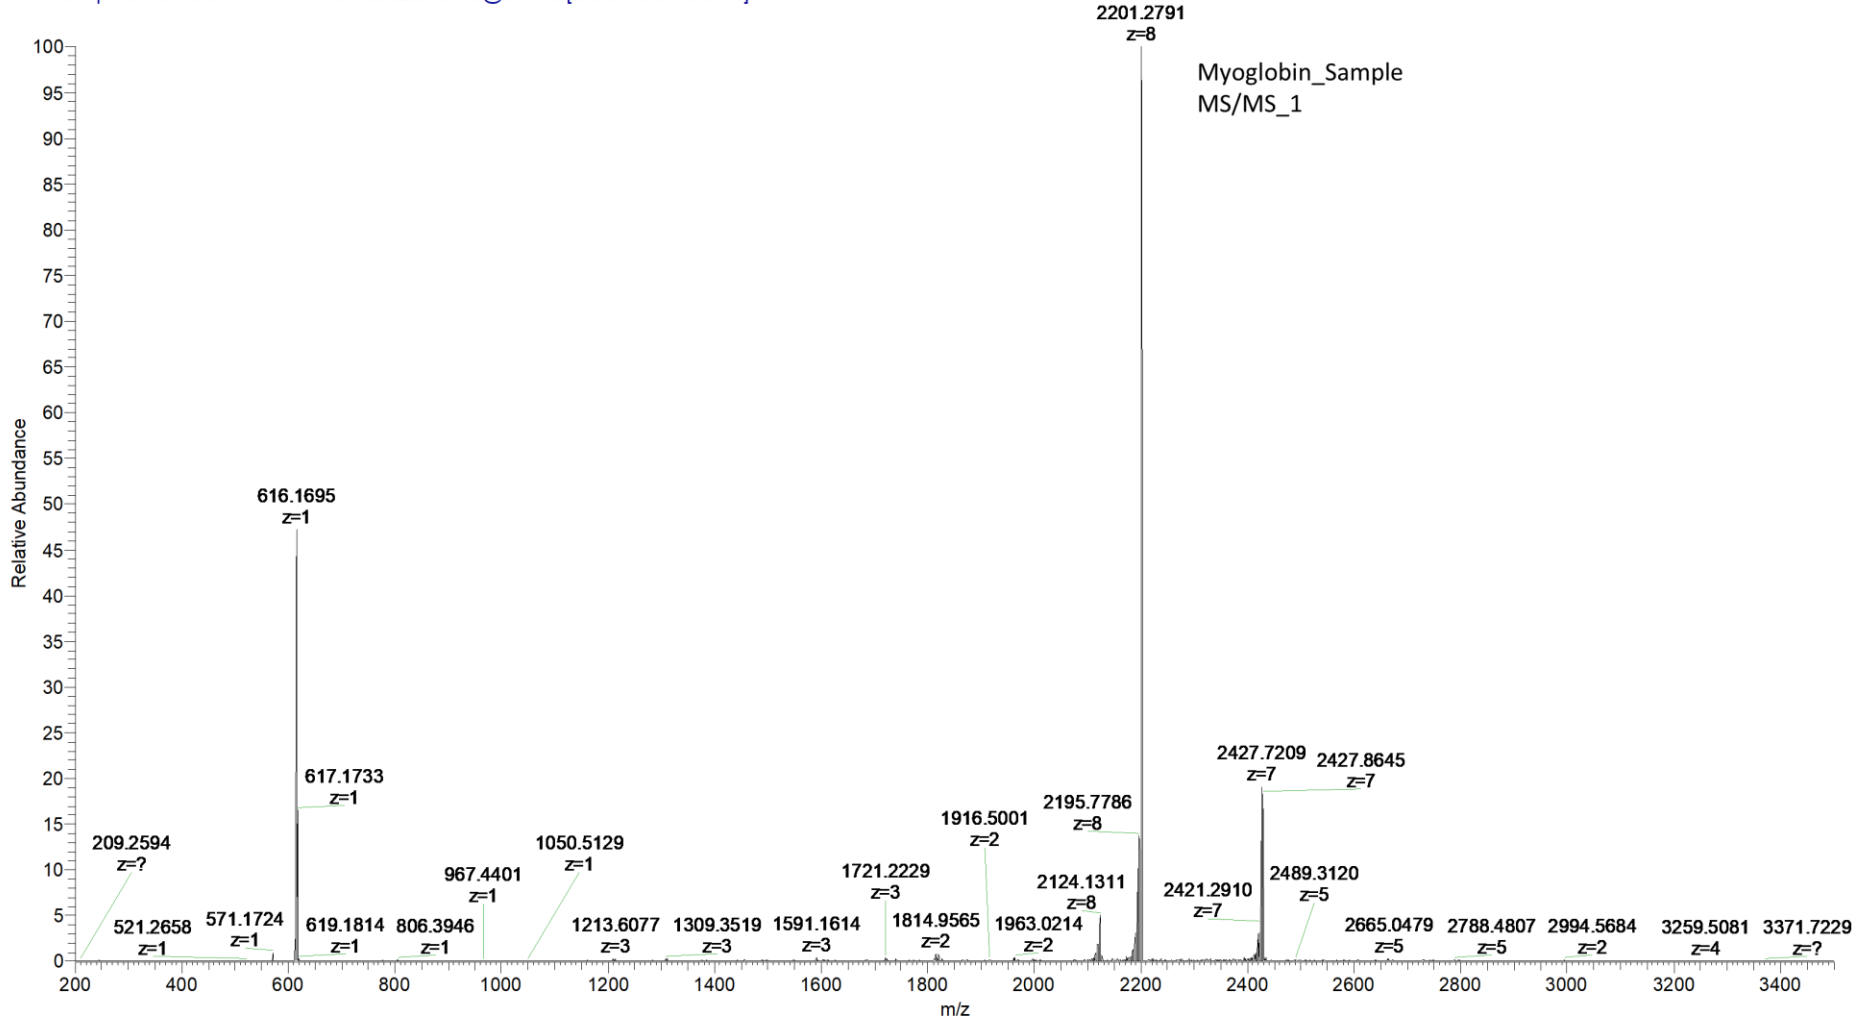

20230308\_20230227\_Mb10uM+100mMK3PO4+Ar+RT2H\_z8\_2201\_Sample\_1\_2#20 RT: 0.24 AV: 1 NL: 1.06E6  
T: FTMS + p NSI sid=15.00 cv=15.00 Full ms2 2201.3999@cid1.00 [200.0000-3500.0000]

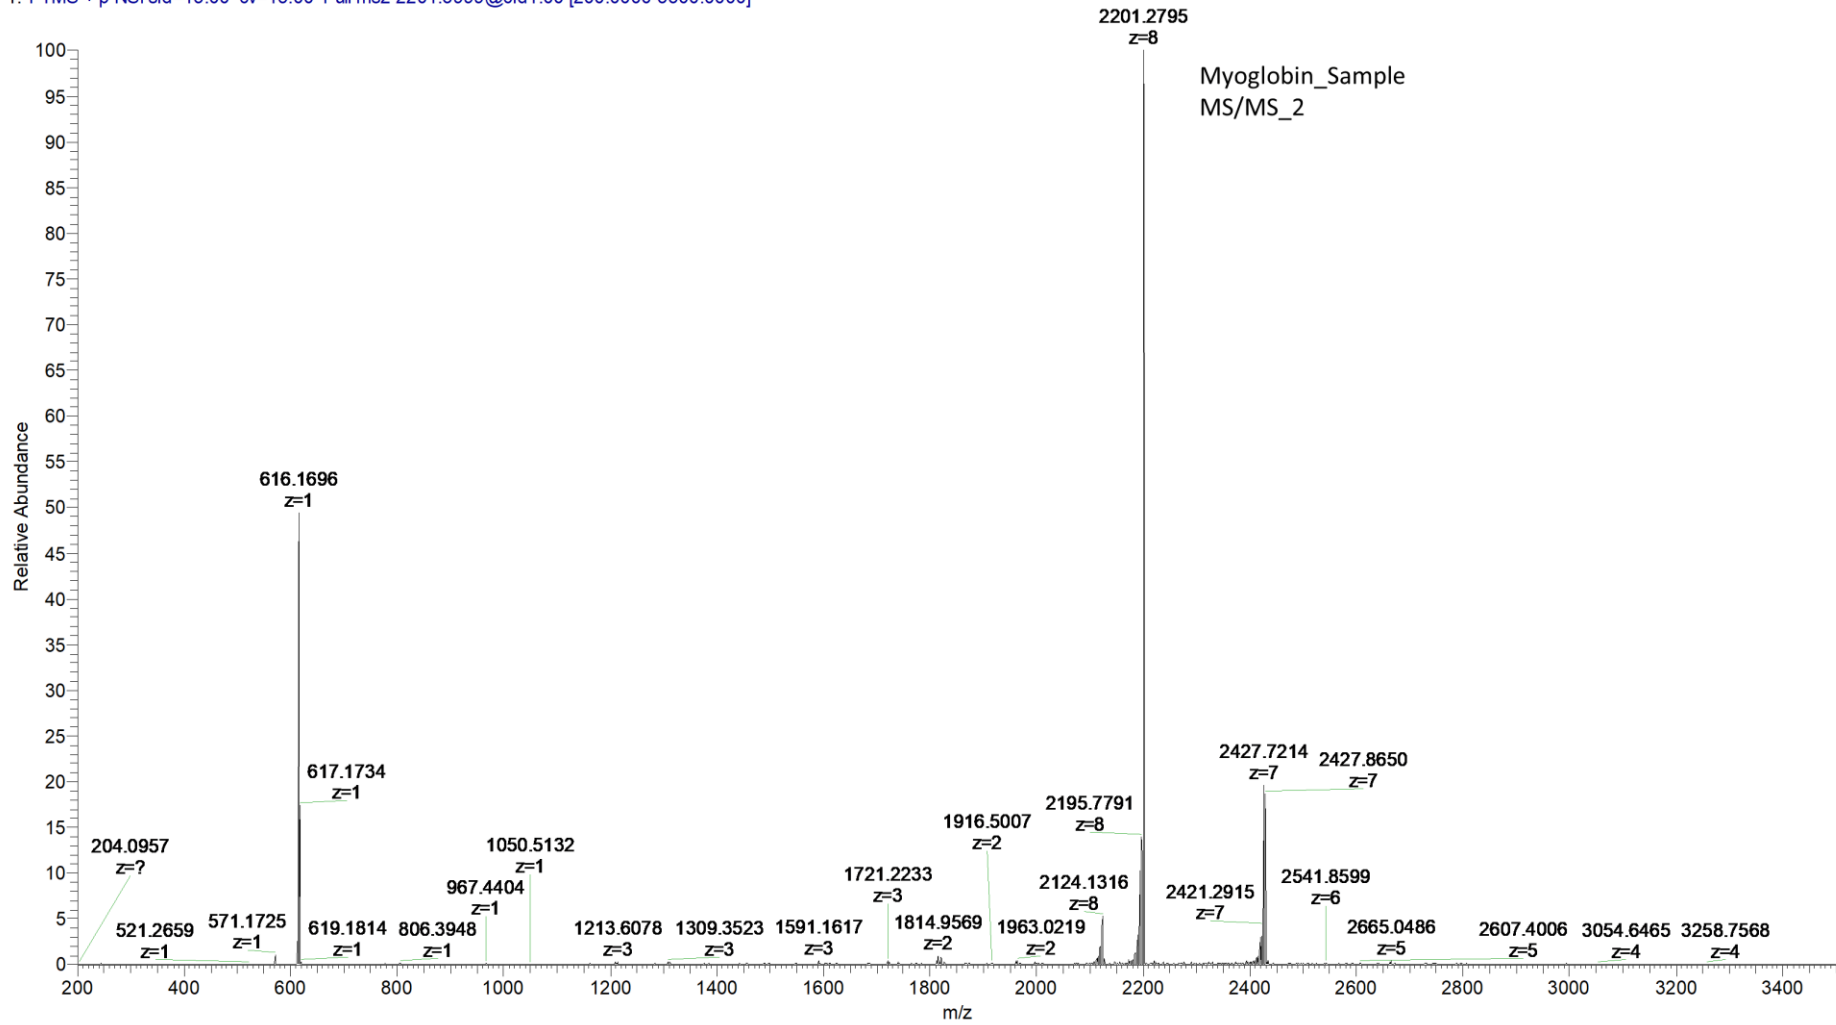

20230308\_20230227\_Mb10uM+100mMK3PO4+Ar+RT2H\_z8\_2201\_Sample\_1\_3#20 RT: 0.24 AV: 1 NL: 1.06E6  
T: FTMS + p NSI sid=15.00 cv=15.00 Full ms2 2201.3999@cid1.00 [200.0000-3500.0000]

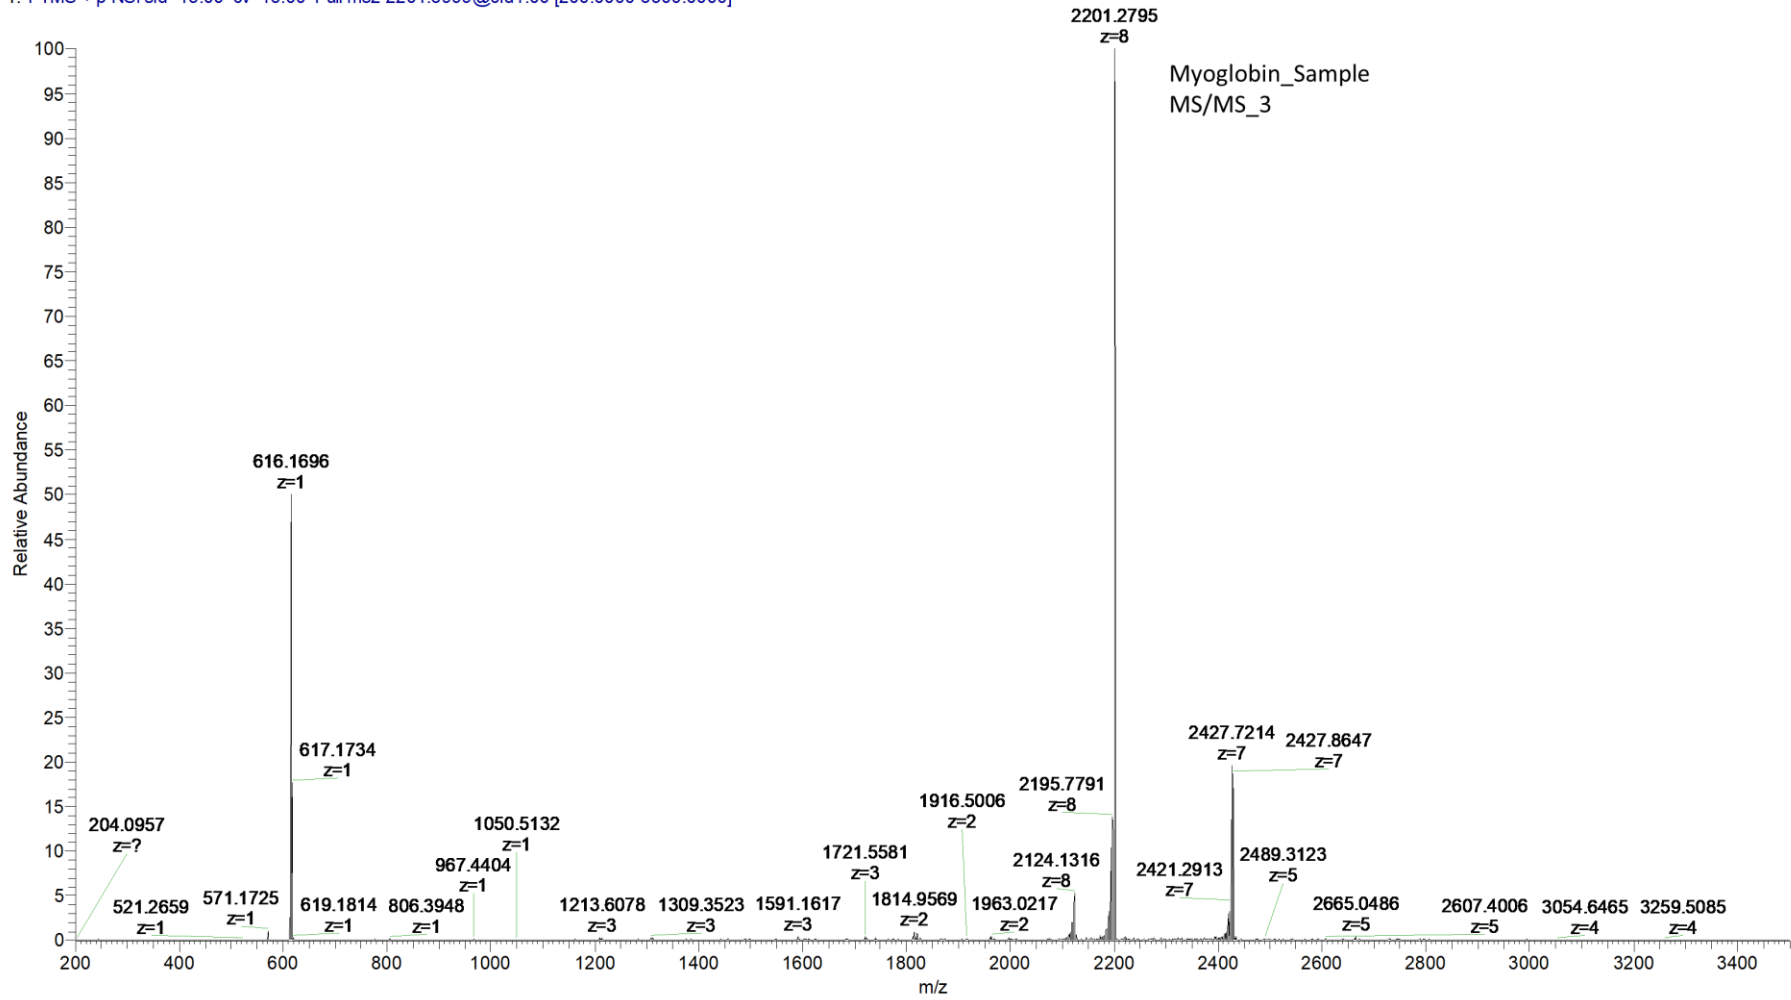

Supplement: d3ra08636d1.pdf [file d3ra08636d1.pdf]
